# Supplementary material for: Cirripectes matatakaro, a new species of combtooth blenny from the Central Pacific, illuminates the origins of the Hawaiian fish fauna
Source: PeerJ. 2020 Mar 24;8:e8852. doi: 10.7717/peerj.8852 (PMC7100598; doi:10.7717/peerj.8852)
Supplement: Supplemental Information 1 [file peerj-08-8852-s001.xlsx]

## Sheet: institution codes
Code	Institution	Location	State	Country
USNM	Smithsonian Institution National Museum of Natural History	Washington	DC	USA
CAS	California Academy of Sciences	San Francisco	CA	USA
BPBM	Bernice Pauahi Bishop Museum	Honolulu	HI	USA

## Sheet: USNM
Institutional Code	Catalog Number	Kind of Object	Special Collections	Specimen Count	Identification	Other Identifications	Name Hierarchy	Type Status	Type Citations	Order	Family	Subfamily	Date Collected	Ocean	Sea/Gulf	Archipelago	Island Grouping	Island Name	Continent	Country	Province/State	District/County	Precise Locality	Centroid Latitude	Centroid Longitude	Collector(s)	Field Number(s)	Other Numbers (Type : Value)	Vessel	Cruise	Station	Expedition	Collection Method	Depth (m)	Source of Sample	Preparation Details (Preparation:Location:Count)	Measurements	Notes	Accession Number	Genetic Sample Type	Biorepository Number	Specimen Voucher Number	Bold ID	GenBank Numbers	Preservation Method	Embargo?	Depleted?	Record Last Modified	EZID
USNM	115488	Specimen/Lot		127	Cirripectes variolosus		Cirripectes variolosus : Blenniidae : Perciformes : Actinopterygii : Chordata			Perciformes	Blenniidae	Salariinae	15 May 1939 to 19 May 1939 (1939 May 15 - 1939 May 19)	Pacific		Phoenix Islands		Enderbury Island		Kiribati			Enderbury Island, reef	-3.14158	-171.093	Schultz, L. P.	U-39-253 to U-39-392					Navy Surveying Expedition to the Phoenix Islands, 1939							151472									2017-09-13 15:47:00	http://n2t.net/ark:/65665/3e51ca332-eecd-48d9-b5fe-68fff6ec3659
USNM	115494	Specimen/Lot		46	Cirripectes variolosus		Cirripectes variolosus : Blenniidae : Perciformes : Actinopterygii : Chordata			Perciformes	Blenniidae	Salariinae	7 Jul 1939 to 17 Jul 1939 (1939 Jul 07 - 1939 Jul 17)	Pacific		Phoenix Islands		Hull Island		Kiribati			Hull Island, lagoon.	-4.4881	-172.171	Schultz, L. P.						Navy Surveying Expedition to the Phoenix Islands, 1939							151472									2017-09-13 15:47:00	http://n2t.net/ark:/65665/3a30cabf5-d70d-4dd2-ab89-35fb31044c7a
USNM	142107	Specimen/Lot		1	Cirripectes variolosus		Cirripectes variolosus : Blenniidae : Perciformes : Actinopterygii : Chordata			Perciformes	Blenniidae	Salariinae	29 Jun 1946 (1946 Jun 29)	Pacific		Marshall Islands	Ralik Chain	Rongerik Atoll		Marshall Islands			Marshall Islands: Rongerik Atoll, Eniwetak Island, ocean reef in surf and on reef.			Schultz, L. P.; Herald, E. S.	S-46-241					Operation Crossroads Project, 1946-1947							172586									2017-10-04 13:07:00	http://n2t.net/ark:/65665/33739caf5-7519-48e9-ba50-1b38e456b471
USNM	142108	Specimen/Lot		2	Cirripectes variolosus		Cirripectes variolosus : Blenniidae : Perciformes : Actinopterygii : Chordata			Perciformes	Blenniidae	Salariinae	31 Jul 1946 (1946 Jul 31)	Pacific		Marshall Islands	Ralik Chain	Rongelap Atoll		Marshall Islands			Marshall Islands: Rongelap Atoll at Yugui Island, west side of Island, ocean reef next to small boat passage.			Herald, E. S.	S-46-304					Operation Crossroads Project, 1946-1947	Rotenone						172586									2017-10-04 13:07:00	http://n2t.net/ark:/65665/3eb6ad1f8-4b96-4aa5-9292-f30672d8a876
USNM	142109	Specimen/Lot		15	Cirripectes variolosus		Cirripectes variolosus : Blenniidae : Perciformes : Actinopterygii : Chordata			Perciformes	Blenniidae	Salariinae	28 May 1946 (1946 May 28)	Pacific		Marshall Islands	Ralik Chain	Eniwetok Atoll		Marshall Islands			Marshall Islands: Eniwetok Atoll, Mui Island in surf of ocean reef.			Schultz, L. P.	S-46-186					Operation Crossroads Project, 1946-1947	Rotenone	9					172586									2017-09-13 15:47:00	http://n2t.net/ark:/65665/391ee008f-a871-45d9-a801-0b78b51af9d9
USNM	142110	Specimen/Lot		7	Cirripectes variolosus		Cirripectes variolosus : Blenniidae : Perciformes : Actinopterygii : Chordata			Perciformes	Blenniidae	Salariinae	1 Sep 1946 (1946 Sep 1)	Pacific		Marshall Islands	Ralik Chain	Kwajalein Atoll		Marshall Islands			Marshall Islands: Kwajalein Atoll at lagoon reef located near southern end of Ennylabegan Island.			Herald, E. S.	S-46-397					Operation Crossroads Project, 1946-1947	Poison; Dipnet						172586									2017-10-04 13:07:00	http://n2t.net/ark:/65665/3a54696a8-ee8f-4cd4-8c1e-951fb0ca8bdf
USNM	142111	Specimen/Lot		41	Cirripectes variolosus		Cirripectes variolosus : Blenniidae : Perciformes : Actinopterygii : Chordata			Perciformes	Blenniidae	Salariinae	16 Apr 1946 (1946 Apr 16)	Pacific		Marshall Islands	Ralik Chain	Bikini Atoll		Marshall Islands			Marshall Islands: Bikini Atoll, Airukiraru (Airy) Island, reef on the ocean side at, near, in surf.			Schultz, L. P.	S-46-96					Operation Crossroads Project, 1946-1947	Rotenone						172586									2017-09-13 15:47:00	http://n2t.net/ark:/65665/3db7df557-ac0e-4bc6-9b03-f00349e8d7d6
USNM	142112	Specimen/Lot		12	Cirripectes variolosus		Cirripectes variolosus : Blenniidae : Perciformes : Actinopterygii : Chordata			Perciformes	Blenniidae	Salariinae	21 Jul 1947 (1947 Jul 21)	Pacific		Marshall Islands	Ralik Chain	Bikini Atoll		Marshall Islands			Marshall Islands: Bikini Atoll: lagoon side reef halfway between Bikini and Amen Islands.			Schultz, L. P.; Brock, V. E.; Hiatt, R. W.	S-46-442					Operation Crossroads Project, 1946-1947	Rotenone	0 to 3					176603									2018-07-25 18:38:00	http://n2t.net/ark:/65665/394d34cf4-2861-4a5a-aa50-981fbd2cb773
USNM	142113	Specimen/Lot		26	Cirripectes variolosus		Cirripectes variolosus : Blenniidae : Perciformes : Actinopterygii : Chordata			Perciformes	Blenniidae	Salariinae	19 Jul 1947 (1947 Jul 19)	Pacific		Marshall Islands	Ralik Chain	Bikini Atoll		Marshall Islands			Marshall Islands: Bikini Atoll, Eman Island, ocean surf at eastern end.			Schultz, L. P.; Brock, V. E.; Myers, G. S.; Hiatt, R. W.	S-46-441					Operation Crossroads Project, 1946-1947	Rotenone						176603									2018-07-25 18:38:00	http://n2t.net/ark:/65665/3a985f4f6-d610-4865-8483-23f56c4b23ff
USNM	166791	Specimen/Lot		1	Cirripectes variolosus		Cirripectes variolosus : Blenniidae : Perciformes : Actinopterygii : Chordata			Perciformes	Blenniidae	Salariinae	1 Jul 1950 (1950 Jul 01 - 0000 00 00)	Pacific		Marshall Islands	Ratak Chain	Arno Atoll		Marshall Islands			Marshalls: Arno Atoll, Ine Island, ocean reef, sect. E1-XI.			Strasburg, D. W.; Hiatt, R. W.		Sample Number : E1-279											199700									2020-01-24 17:45:00	http://n2t.net/ark:/65665/3050c64ab-ae61-4b32-99e7-a3fca056748b
USNM	166792	Specimen/Lot		1	Cirripectes variolosus		Cirripectes variolosus : Blenniidae : Perciformes : Actinopterygii : Chordata			Perciformes	Blenniidae	Salariinae	3 Jul 1950 (1950 Jul 03 - 0000 00 00)	Pacific		Marshall Islands	Ratak Chain	Arno Atoll		Marshall Islands			Marshalls: Arno Atoll, Eoneb-Je Island, Lagoon Reef			Strasburg, D. W.; Hiatt, R. W.												Original no. e2-103;sect. e2-v.	199700									2020-01-24 17:45:00	http://n2t.net/ark:/65665/3da530a0e-dfb9-45dc-bba2-0a5095ab13b3
USNM	167333	Specimen/Lot		2	Cirripectes variolosus		Cirripectes variolosus : Blenniidae : Perciformes : Actinopterygii : Chordata			Perciformes	Blenniidae	Salariinae	Jul 1951 to Aug 1951 (1951 Jul 00 - 1951 Aug 00)	Pacific		Gilbert Islands		Onotoa Atoll		Kiribati			Gilbert Islands: Onotoa Atoll			Randall, J. E.; Strasburg, D. W.						Onotoa Atoll, Gilbert Islands Expedition, Summer 1951							195399									2020-02-03 16:58:00	http://n2t.net/ark:/65665/3ddf55b86-7f5e-4421-ab49-133c8e735ef6
USNM	195809	Specimen/Lot		1	Cirripectes variolosus		Cirripectes variolosus : Blenniidae : Perciformes : Actinopterygii : Chordata			Perciformes	Blenniidae	Salariinae	Oct 1944 (1944 Oct 00 - 0000 00 00)	Pacific		Line Islands		Palmyra Atoll		Palmyra Atoll	United States Minor Outlying Islands		Pacific, northwest Christmas Island, Palmyra Island			Chapman, W. M.													180183									2017-12-04 16:22:00	http://n2t.net/ark:/65665/354997f3c-d0ad-438f-a096-794d96096e05
USNM	198731	Specimen/Lot		32	Cirripectes variolosus		Cirripectes variolosus : Blenniidae : Perciformes : Actinopterygii : Chordata			Perciformes	Blenniidae	Salariinae	16 May 1964 (1964 May 16 - 0000 00 00)	Pacific				Johnston Atoll		Johnston Atoll	United States Minor Outlying Islands		Sand Is. Johnston Atoll, Pacific Ocean			Amerson, A. B.												13 spec. recat as usnm 227550, 20 recat. as 227551	253451									2014-08-20 18:38:00	http://n2t.net/ark:/65665/3bac49592-8c66-4e67-878b-b4febc36d520
USNM	200614	Specimen/Lot		61	Cirripectes variolosus		Cirripectes variolosus : Blenniidae : Perciformes : Actinopterygii : Chordata			Perciformes	Blenniidae	Salariinae	15 Oct 1964 to 11 Nov 1964	Pacific		Marshall Islands				Marshall Islands			Marshall Islands: from Bikar, Taka or Kwajalein Atolls.			Amerson, A. B.; SIPOBS personnel						Smithsonian Institution Pacific Ocean Biological Survey				Glycerin with Bone and Cartilage Stain::2		Rec. from: s.i.p.o.b.s. 3 specs. cleared & stained , but only 2 located as of August 2010. 2 specs. recat. as usnm 227559.	254650									2014-08-20 19:32:00	http://n2t.net/ark:/65665/370f4be2e-3055-4984-87c5-4b21bf5feb72
USNM	227633	Specimen/Lot		6	Cirripectes variolosus		Cirripectes variolosus : Blenniidae : Perciformes : Actinopterygii : Chordata			Perciformes	Blenniidae	Salariinae	10 Sep 1980 (1980 Sep 10 - 0000 00 00; 09:40 - 11:30)	Pacific		Caroline Islands				Micronesia	Pohnpei		Ponape: Ocean Side Nankapenparam Reef - NE of Ponape Pass	7.0331	158.234	Springer, V. G.	VGS 80-11											Out of usnm 224378.	339879									2014-08-20 18:26:00	http://n2t.net/ark:/65665/32e4a1ae0-d32c-4aa1-9fb9-f209a16025a9
USNM	227947	Specimen/Lot		1	Cirripectes variolosus		Cirripectes variolosus : Blenniidae : Perciformes : Actinopterygii : Chordata			Perciformes	Blenniidae	Salariinae	1 Nov 1964 (1964 Nov 01)	Pacific		Marshall Islands	Ralik Chain	Kwajalein Atoll		Marshall Islands			Marshall Islands: Kwajalein Atoll, Carlson Island, inside of lagoon, along coral reef where it meets deep water.			Amerson, A. B.; SIPOBS personnel						Smithsonian Institution Pacific Ocean Biological Survey	Poison	2 to 9					254650									2014-08-20 18:27:00	http://n2t.net/ark:/65665/3428b2d01-fd46-441b-a3b3-c692c574c672
USNM	227948	Specimen/Lot		1	Cirripectes variolosus		Cirripectes variolosus : Blenniidae : Perciformes : Actinopterygii : Chordata			Perciformes	Blenniidae	Salariinae	1 Mar 1965 (1965 Mar 01)	Pacific			Tokelau Islands	Nukunonu Atoll		Tokelau			Tokelau Islands: Nukunono Atoll, among coral heads			Huber, L. N.						Smithsonian Institution Pacific Ocean Biological Survey	Poison	0.2 to 2					254650									2014-08-20 18:27:00	http://n2t.net/ark:/65665/3b838a117-e879-4210-86a3-96184e5d6825
USNM	227949	Specimen/Lot		5	Cirripectes variolosus		Cirripectes variolosus : Blenniidae : Perciformes : Actinopterygii : Chordata			Perciformes	Blenniidae	Salariinae	2 Sep 1968 (1968 Sep 02 - 0000 00 00)	Pacific				Marcus Island		Marcus Island			Marcus Island; Reef Flat Off Balloon Bldg.			Randall, J. E.; Zych, A. A.								0 to 1					0									2020-02-03 16:52:00	http://n2t.net/ark:/65665/302183c44-42b0-4538-b555-104b45e0842f
USNM	227950	Specimen/Lot		1	Cirripectes variolosus		Cirripectes variolosus : Blenniidae : Perciformes : Actinopterygii : Chordata			Perciformes	Blenniidae	Salariinae	17 Jun 1965 (1965 Jun 17)	Pacific		Line Islands		Caroline Atoll		Kiribati			Line Islands: Caroline Island, NW of South Island.			Huber, L. N.	F-9					Smithsonian Institution Pacific Ocean Biological Survey		0 to 1					261502									2014-08-20 18:27:00	http://n2t.net/ark:/65665/3dfe223fc-03a5-4726-9662-729eea99cae7
USNM	227951	Specimen/Lot		2	Cirripectes variolosus		Cirripectes variolosus : Blenniidae : Perciformes : Actinopterygii : Chordata			Perciformes	Blenniidae	Salariinae	1964-11-08	Pacific		Phoenix Islands		Birnie Island		Kiribati			Phoenix Islands: Birnie Island, northern part of west side of island.			Sibley, F. C.	F-480 thru F-513	Sample Number : F-512				Smithsonian Institution Pacific Ocean Biological Survey	Poison	0 to 0.8					253451									2014-08-20 18:27:00	http://n2t.net/ark:/65665/314ceda6f-84c1-45d7-bd40-e3d6e2e835d4
USNM	227952	Specimen/Lot		7	Cirripectes variolosus		Cirripectes variolosus : Blenniidae : Perciformes : Actinopterygii : Chordata			Perciformes	Blenniidae	Salariinae	31 May 1965 (1965 May 31 - 0000 00 00)	Pacific		Tonga Islands		Niuatoputapu		Tonga			Niuatobutabu [sic] Island, Tonga	-16	-173.88	Bolin, R. L.			Te Vega	7	301	Te Vega Expedition	Poison	0 to 6					273221									2014-08-20 18:27:00	http://n2t.net/ark:/65665/3467c4526-bec1-4033-b27a-48b4dd7ce2e3
USNM	227953	Specimen/Lot		3	Cirripectes variolosus		Cirripectes variolosus : Blenniidae : Perciformes : Actinopterygii : Chordata			Perciformes	Blenniidae	Salariinae	1964-11-08	Pacific		Phoenix Islands		Birnie Island		Kiribati			Phoenix Islands: Birnie Island, northern part of west side of island.			Sibley, F. C.	F-480 thru F-513	Sample Number : F-515				Smithsonian Institution Pacific Ocean Biological Survey	Poison	0 to 0.8				Possible label error, according to field notes F-515 is a halfbeak collected on Nov 22, 1964.	253451									2014-08-20 18:27:00	http://n2t.net/ark:/65665/34c74b9e3-225f-4e4c-8a4f-841ee4d59706
USNM	227954	Specimen/Lot		7	Cirripectes variolosus		Cirripectes variolosus : Blenniidae : Perciformes : Actinopterygii : Chordata			Perciformes	Blenniidae	Salariinae	6 Sep 1968 (1968 Sep 06 - 0000 00 00)	Pacific				Marcus Island		Marcus Island			Marcus Island; Outside Reef On West Side			Randall, J. E.; Pederson, T.								6 to 12					0									2020-02-03 16:52:00	http://n2t.net/ark:/65665/34f3e78ce-a0f4-404c-ab35-f83c4655879f
USNM	227955	Specimen/Lot		4	Cirripectes variolosus		Cirripectes variolosus : Blenniidae : Perciformes : Actinopterygii : Chordata			Perciformes	Blenniidae	Salariinae	13 Jun 1965 (1965 Jun 13)	Pacific		Cook Islands		Penrhyn Atoll (Tongareva)		Cook Islands			Cook Islands: Tongareva Atoll, NW corner of atoll, in second channel north of Molokai Island.			Huber, L. N.; Sibley, F. C.	F-6					Smithsonian Institution Pacific Ocean Biological Survey	Poison	0 to 1					254650									2014-08-20 18:27:00	http://n2t.net/ark:/65665/308829f13-2148-4a9a-bee4-273a391a2e7c
USNM	227956	Specimen/Lot		7	Cirripectes variolosus		Cirripectes variolosus : Blenniidae : Perciformes : Actinopterygii : Chordata			Perciformes	Blenniidae	Salariinae	19 Oct 1964 (1964 Oct 19)	Pacific		Phoenix Islands		McKean Island		Kiribati			Phoenix Islands: McKean Island, west side of island in front of flagpole.			Sibley, F. C.	F-408 thru F-458	Sample Number : F-437				Smithsonian Institution Pacific Ocean Biological Survey	Poison	0 to 2					253451									2014-08-20 18:27:00	http://n2t.net/ark:/65665/3a289d27a-b839-43d1-bd8a-9cf1249943f6
USNM	227959	Specimen/Lot		3	Cirripectes variolosus		Cirripectes variolosus : Blenniidae : Perciformes : Actinopterygii : Chordata			Perciformes	Blenniidae	Salariinae	1964-11-18	Pacific		Line Islands		Jarvis Island		Jarvis Island	United States Minor Outlying Islands		Line Islands: Jarvis Island, SW side of island.			Sibley, F. C.	F-514	Sample Number : F-514				Smithsonian Institution Pacific Ocean Biological Survey	Poison	0 to 3					253451									2014-08-20 18:27:00	http://n2t.net/ark:/65665/369536bdc-6175-4001-bf84-6d0fdcc6785f
USNM	227960	Specimen/Lot		2	Cirripectes variolosus		Cirripectes variolosus : Blenniidae : Perciformes : Actinopterygii : Chordata			Perciformes	Blenniidae	Salariinae	3 May 1957 (1957 May 03)	Pacific		Society Islands		Huahine		French Polynesia			Huahine, S. of Passe Avamoa, near Fare.			Schmitt, W. L.; Rehder, H. A.; Bowman, T. E.; Cutress, C. E.					95-57	Smithsonian Institution-Bredin Expedition, Society and Tuamotu Islands, 1957	Rotenone						213821									2018-01-26 19:50:00	http://n2t.net/ark:/65665/398ee0a26-45de-47bc-bb48-6c2bcb7e7b0f
USNM	227961	Specimen/Lot		2	Cirripectes variolosus		Cirripectes variolosus : Blenniidae : Perciformes : Actinopterygii : Chordata			Perciformes	Blenniidae	Salariinae	27 Apr 1957 (1957 Apr 27)	Pacific		Society Islands		Bora Bora		French Polynesia			Bora Bora, Muller Reef, S. of Teavanui Pass, lagoon side of ocean reef.			Schmitt, W. L.; Rehder, H. A.; Bowman, T. E.; Cutress, C. E.					69-57	Smithsonian Institution-Bredin Expedition, Society and Tuamotu Islands, 1957	Rotenone						213821									2018-01-26 19:50:00	http://n2t.net/ark:/65665/3d5b5a606-3649-4155-8d97-750ac478f7ab
USNM	227962	Specimen/Lot		1	Cirripectes variolosus		Cirripectes variolosus : Blenniidae : Perciformes : Actinopterygii : Chordata			Perciformes	Blenniidae	Salariinae	27 Apr 1957 (1957 Apr 27)	Pacific		Society Islands		Bora Bora		French Polynesia			Bora Bora, Muller Reef, S. of Teavanui Pass, lagoon side of ocean reef.			Schmitt, W. L.; Rehder, H. A.; Bowman, T. E.; Cutress, C. E.					69-57	Smithsonian Institution-Bredin Expedition, Society and Tuamotu Islands, 1957	Rotenone						213821									2018-01-26 19:50:00	http://n2t.net/ark:/65665/3176e17f5-b0bd-45a6-869a-6c612cb73448
USNM	227969	Specimen/Lot		20	Cirripectes variolosus		Cirripectes variolosus : Blenniidae : Perciformes : Actinopterygii : Chordata			Perciformes	Blenniidae	Salariinae	13 Jun 1965 (1965 Jun 13 - 0000 00 00)	Pacific		Cook Islands		Penrhyn Atoll (Tongareva)		Cook Islands			Cook Islands: Tongareva Atoll, NW side of atoll, on lagoon side of some little islets south of Molokai Island.			Huber, L. N.; Amerson, A. B.	F-5							1 to 2					261502									2014-08-20 18:27:00	http://n2t.net/ark:/65665/3a036797e-667e-413b-b275-aa95102fa622
USNM	227970	Specimen/Lot		6	Cirripectes variolosus		Cirripectes variolosus : Blenniidae : Perciformes : Actinopterygii : Chordata			Perciformes	Blenniidae	Salariinae	17 Jun 1965 (1965 Jun 17)	Pacific		Line Islands		Caroline Atoll		Kiribati			Line Islands, Caroline Island, in channel on lagoon side, north of South Is. at southwest end of atoll.			Huber, L. N.	F-8					Smithsonian Institution Pacific Ocean Biological Survey	Poison	0 to 2					0									2014-08-20 18:27:00	http://n2t.net/ark:/65665/3f343226f-8930-4e1f-ab7a-ac983772a9bc
USNM	227971	Specimen/Lot		1	Cirripectes variolosus		Cirripectes variolosus : Blenniidae : Perciformes : Actinopterygii : Chordata			Perciformes	Blenniidae	Salariinae	3 May 1957 (1957 May 03)	Pacific		Society Islands		Huahine		French Polynesia			Huahine, S. of Passe Avamoa, near Fare.			Schmitt, W. L.; Rehder, H. A.; Bowman, T. E.; Cutress, C. E.					95-57	Smithsonian Institution-Bredin Expedition, Society and Tuamotu Islands, 1957	Rotenone						213821									2018-01-26 19:50:00	http://n2t.net/ark:/65665/39e5b108b-b5c7-412c-a7f3-f68c4867ef78
USNM	227972	Specimen/Lot		1	Cirripectes variolosus		Cirripectes variolosus : Blenniidae : Perciformes : Actinopterygii : Chordata			Perciformes	Blenniidae	Salariinae	3 May 1957 (1957 May 03)	Pacific		Society Islands		Huahine		French Polynesia			Huahine, S. of Passe Avamoa, near Fare.			Schmitt, W. L.; Rehder, H. A.; Bowman, T. E.; Cutress, C. E.					95-57	Smithsonian Institution-Bredin Expedition, Society and Tuamotu Islands, 1957	Rotenone						213821									2018-01-26 19:50:00	http://n2t.net/ark:/65665/39506eb1b-96c8-44f4-8404-3c95f57e12b3
USNM	227973	Specimen/Lot		1	Cirripectes variolosus		Cirripectes variolosus : Blenniidae : Perciformes : Actinopterygii : Chordata			Perciformes	Blenniidae	Salariinae	15 Mar 1956 (1956 Mar 15 - 0000 00 00)	Pacific		Tuamotu Archipelago				French Polynesia			Makatea Tuamotus, Just West of Phosphate Dock			Randall, J. E.													0									2020-02-03 16:52:00	http://n2t.net/ark:/65665/311f10a37-9ce0-4b0b-81e7-109a63797073
USNM	227974	Specimen/Lot		2	Cirripectes variolosus		Cirripectes variolosus : Blenniidae : Perciformes : Actinopterygii : Chordata			Perciformes	Blenniidae	Salariinae	11 Jul 1964 (1964 Jul 11)	Pacific		Phoenix Islands		Phoenix Island [Rawaki]		Kiribati			Phoenix Islands, Phoenix Island, reef off west side.			Sibley, F. C.	F-312 thru F-339; F-365 thru F-377	Sample Number : F-328				Smithsonian Institution Pacific Ocean Biological Survey	Poison	0 to 2				Larvae	254650									2014-08-20 18:27:00	http://n2t.net/ark:/65665/3bf2a6329-2a06-4abd-8534-b1b5cc13b2f7
USNM	227975	Specimen/Lot		25	Cirripectes variolosus		Cirripectes variolosus : Blenniidae : Perciformes : Actinopterygii : Chordata			Perciformes	Blenniidae	Salariinae	1965-07-22	Pacific		Line Islands		Kiritimati (Christmas Island)		Kiribati			Christmas Island.	1.9458	-157.496	Bolin, R. L.			Te Vega	8	332			3 to 4					273221									2014-08-20 18:27:00	http://n2t.net/ark:/65665/3b6caad30-cdfe-43ff-a174-4db232050234
USNM	227976	Specimen/Lot		2	Cirripectes variolosus		Cirripectes variolosus : Blenniidae : Perciformes : Actinopterygii : Chordata			Perciformes	Blenniidae	Salariinae	19 Oct 1964 (1964 Oct 19 - 0000 00 00)	Pacific		Phoenix Islands		McKean Island		Kiribati			Phoenix Islands: McKean Island, west side.	-3.58	-174.07	Sibley, F. C.		Sample Number : F-437				Smithsonian Institution Pacific Ocean Biological Survey	Poison	0 to 2					253451									2014-08-20 18:27:00	http://n2t.net/ark:/65665/3fc9d4fbc-7eba-48f5-a3db-3123c9bee7b1
USNM	227977	Specimen/Lot		10	Cirripectes variolosus		Cirripectes variolosus : Blenniidae : Perciformes : Actinopterygii : Chordata			Perciformes	Blenniidae	Salariinae	19 Oct 1964 (1964 Oct 19)	Pacific		Phoenix Islands		McKean Island		Kiribati			Phoenix Islands: McKean Island, west side of island in front of flagpole.			Sibley, F. C.	F-408 thru F-458	Sample Number : F-437				Smithsonian Institution Pacific Ocean Biological Survey	Poison	0 to 2					0									2014-08-20 18:27:00	http://n2t.net/ark:/65665/38996ee26-ed26-47b1-aad2-22b407370895
USNM	227978	Specimen/Lot		6	Cirripectes variolosus		Cirripectes variolosus : Blenniidae : Perciformes : Actinopterygii : Chordata			Perciformes	Blenniidae	Salariinae		Pacific									Pacific Ocean			Sibley, F. C.												Locality data questionable, see additional jar label. This lot was with a group of Pacific Plate specimens incorrectly labeled as being from field number HA 67-71 (Aldabra). These specimens appear to have been collected by Sibley during the SI Pacific Ocean Biological Survey program. The state of preservation matches that of similar specimens of these species taken by Sibley at the Phoenix Island…	253451									2014-08-20 18:27:00	http://n2t.net/ark:/65665/307cf7bca-083c-4dbe-9590-33996525fe48
USNM	228109	Specimen/Lot		2	Cirripectes variolosus		Cirripectes variolosus : Blenniidae : Perciformes : Actinopterygii : Chordata			Perciformes	Blenniidae	Salariinae	2 Nov 1964 (1964 Nov 02)	Pacific		Marshall Islands	Ralik Chain	Kwajalein Atoll		Marshall Islands			Marshall Islands: Kwajalein Atoll, Little Buster Island, inside of lagoon, among coral heads along reef line.			Amerson, A. B.; SIPOBS personnel						Smithsonian Institution Pacific Ocean Biological Survey	Poison	2 to 9					254650									2014-08-20 18:27:00	http://n2t.net/ark:/65665/3747e0e87-b449-4e3e-88af-8364a7991966
USNM	274478	Specimen/Lot		1	Cirripectes variolosus		Cirripectes variolosus : Blenniidae : Perciformes : Actinopterygii : Chordata			Perciformes	Blenniidae	Salariinae	19 Oct 1964 (1964 Oct 19)	Pacific		Phoenix Islands		McKean Island		Kiribati			Phoenix Islands: McKean Island, west side of island in front of flagpole.			Sibley, F. C.	F-408 thru F-458	Sample Number : F-437				Smithsonian Institution Pacific Ocean Biological Survey	Poison	0 to 2					253451									2014-08-20 18:39:00	http://n2t.net/ark:/65665/3b649daed-8027-4fbc-ba1a-9b990ae5cd75
USNM	274479	Specimen/Lot		15	Cirripectes variolosus		Cirripectes variolosus : Blenniidae : Perciformes : Actinopterygii : Chordata			Perciformes	Blenniidae	Salariinae	19 Oct 1964 (1964 Oct 19)	Pacific		Phoenix Islands		McKean Island		Kiribati			Phoenix Islands: McKean Island, west side of island in front of flagpole.			Sibley, F. C.	F-408 thru F-458	Sample Number : F-437				Smithsonian Institution Pacific Ocean Biological Survey	Poison	0 to 2					253451									2014-08-20 18:39:00	http://n2t.net/ark:/65665/3ec5e95d8-d07e-4b83-9a18-1f4a929e8462
USNM	280261	Specimen/Lot		1	Cirripectes variolosus		Cirripectes variolosus : Blenniidae : Perciformes : Actinopterygii : Chordata			Perciformes	Blenniidae	Salariinae	24 Jun 1965 (1965 Jun 24)	Pacific		Line Islands		Malden Island		Kiribati			Line Islands: Malden Island, mid -west end			Huber, L. N.	F-11					Smithsonian Institution Pacific Ocean Biological Survey	Poison	0 to 3				Out of usnm 199460.	261502									2014-08-20 18:40:00	http://n2t.net/ark:/65665/34245a0c2-0b1c-41bb-889a-0a51e13e36bc
USNM	283135	Specimen/Lot		2	Cirripectes variolosus		Cirripectes variolosus : Blenniidae : Perciformes : Actinopterygii : Chordata			Perciformes	Blenniidae	Salariinae	9 May 1986 (1986 May 09 - 0000 00 00; 09:40 - 11:15)	Pacific		Fiji Islands	Rotuma Group			Fiji			Rotuma, North Coast, Slightly East of Vertical From Sumi (Which Is On the Southcoast)	-12.5	177.083	Springer, V. G.; Johnson, G. D.; Williams, J. T.; Libbey, J. D.	VGS 86-4					Rotuma Expedition	Rotenone	0 to 9					367323									2017-05-23 17:24:00	http://n2t.net/ark:/65665/35a7acb99-02ed-49bc-9914-c237e0bb48ba
USNM	283416	Specimen/Lot		1	Cirripectes variolosus		Cirripectes variolosus : Blenniidae : Perciformes : Actinopterygii : Chordata			Perciformes	Blenniidae	Salariinae	19 May 1986 (1986 May 19 - 0000 00 00; 13:00 - 14:00)	Pacific		Fiji Islands	Rotuma Group	Hatana Island		Fiji			Hatana Island, Off SSE Corner of Island	-12.5	177.083	Johnson, G. D.; Williams, J. T.; Springer, V. G.	VGS 86-15					Rotuma Expedition	Rotenone	9 to 15					367323									2014-08-20 18:13:00	http://n2t.net/ark:/65665/3c65cc66c-0427-4891-a476-c8d3116e5943
USNM	289517	Specimen/Lot		2	Cirripectes variolosus		Cirripectes variolosus : Blenniidae : Perciformes : Actinopterygii : Chordata			Perciformes	Blenniidae	Salariinae	4 Aug 1987 (1987 Aug 04 - 0000 00 00)	Pacific		Line Islands		Kiritimati (Christmas Island)		Kiribati			Line Islands, Christmas Island (Kiritimata), Outer Reef Off Captaincook Hotel (NE Side of Atoll).			Randall, J. E.								2 to 3					376593									2020-02-03 16:52:00	http://n2t.net/ark:/65665/3b98eb909-1815-468c-9d0d-2d2c86f26f84
USNM	296306	Specimen/Lot		1	Cirripectes variolosus		Cirripectes variolosus : Blenniidae : Perciformes : Actinopterygii : Chordata			Perciformes	Blenniidae	Salariinae	13 Feb 1956 (1956 Feb 13 - 0000 00 00)	Pacific		Line Islands		Caroline Atoll		Kiribati			Caroline Atoll, Lee Reef	-10	-150	Randall, J. E.													270251									2020-02-03 16:52:00	http://n2t.net/ark:/65665/3e15b1e54-958b-46f8-b07e-6fa4dbb4b557
USNM	296385	Specimen/Lot		2	Cirripectes variolosus		Cirripectes variolosus : Blenniidae : Perciformes : Actinopterygii : Chordata			Perciformes	Blenniidae	Salariinae	12 Aug 1956 (1956 Aug 12 - 0000 00 00)	Pacific		Society Islands		Moorea		French Polynesia			Moorea, Lagoon Shore Reef Off Faatoai Village.			Randall, J. E.								0 to 2					270251									2020-02-03 16:52:00	http://n2t.net/ark:/65665/37259eb8f-12cc-4e2b-a1f2-42cd7d325d06
USNM	296386	Specimen/Lot		4	Cirripectes variolosus		Cirripectes variolosus : Blenniidae : Perciformes : Actinopterygii : Chordata			Perciformes	Blenniidae	Salariinae	17 Jul 1957 (1957 Jul 17 - 0000 00 00)	Pacific		Marquesas Islands		Nuku Hiva		Marquesas Islands			Marquesas Islands: Nuku Hiva, Anaho Bay, East Side of Bay Near Cliffs At Shore			Randall, J. E.								3 to 6					270251									2020-02-03 16:52:00	http://n2t.net/ark:/65665/3717fdbfa-b5df-4f11-8a4d-4243059d9702
USNM	335189	Specimen/Lot		1	Cirripectes variolosus		Cirripectes variolosus : Blenniidae : Perciformes : Actinopterygii : Chordata			Perciformes	Blenniidae	Salariinae	11 Nov 1993 (1993 Nov 11 - 0000 00 00)	Pacific		Tonga Islands	Ha'apai Group			Tonga			Tonga: Ha'apai Group, Uoleva Island, fringing reef on SE end of island, pools and channels on reef flat.	-19.86	-174.418	Williams, J. T.; Collette, B. B.; Johnson, G. D.; Smith, D. G.; Baldwin, C. C.; Powers, E. A.	JTW 93-28		Ngutulei			Tonga Expedition 1993		0 to 2					405729									2017-12-18 18:20:00	http://n2t.net/ark:/65665/3e7637501-ca11-4c5e-a988-6ad50069d518
USNM	357261	Specimen/Lot		11	Cirripectes variolosus		Cirripectes variolosus : Blenniidae : Perciformes : Actinopterygii : Chordata			Perciformes	Blenniidae	Salariinae	24 Sep 1998 (1998 Sep 24 - 0000 00 00; 14:00 - 15:30)	Pacific		Solomon Islands	Duff Islands			Solomon Islands			Solomon Islands, Santa Cruz Islands, Duff Islands, Lakao at northwest end at Temomoa Point in a small cove in surge channels in big boulders.	-9.7983	165.088	Williams, J. T.; Finan, J. F.; McGrouther, M. A.; Bray, D. J.; Westneat, M. W.; Wright, B. W.; Mooi, R. D.; Thacker, C.; Tokopia, M.; Palenga, L.	SOL 98-31		Butai			Solomon Islands 1998	Rotenone; Dip Net	0 to 10					609263									2017-08-29 12:37:00	http://n2t.net/ark:/65665/38acf634c-11fa-498d-b706-e1746a46e040
USNM	357828	Specimen/Lot		1	Cirripectes variolosus		Cirripectes variolosus : Blenniidae : Perciformes : Actinopterygii : Chordata			Perciformes	Blenniidae	Salariinae	27 Sep 1998 (1998 Sep 27 - 0000 00 00; 16:45 - 18:00)	Pacific		Solomon Islands	Santa Cruz Islands			Solomon Islands			Solomon Islands, Santa Cruz Islands, Ndendo Island (Santa Cruz Island), Nemya Bay at north end of the Bay at Anchorage on coral and rock bottom in surge zone.	-10.8083	165.83	Williams, J. T.; Finan, J. F.; McGrouther, M. A.; Bray, D. J.; Westneat, M. W.; Wright, B. W.; Mooi, R. D.; Thacker, C.; Tokopia, M.; Palenga, L.	SOL 98-38		Butai			Solomon Islands 1998	Rotenone; Dip Net	0 to 10					609263									2017-08-29 12:37:00	http://n2t.net/ark:/65665/398e343a9-977c-42cc-a5b5-97dac5c8f2e1
USNM	365844	Specimen/Lot		1	Cirripectes variolosus		Cirripectes variolosus : Blenniidae : Perciformes : Actinopterygii : Chordata			Perciformes	Blenniidae	Salariinae	28 Jun 2001 (2001 Jun 28 - 0000 00 00)	Pacific		Line Islands		Kiritimati (Christmas Island)		Kiribati			Line Islands, Kiritimati (Christmas Island), Cable Dive Site Off Cook Islands, Coral Reef, Spear.			Randall, J. E.								13				55 mm sl. underwater photos taken of other individuls of the same species.	622491									2020-02-03 16:52:00	http://n2t.net/ark:/65665/3552a5b26-dafb-4ccb-b254-5281ac87754d
USNM	379919	Specimen/Lot		7	Cirripectes variolosus		Cirripectes variolosus : Blenniidae : Perciformes : Actinopterygii : Chordata			Perciformes	Blenniidae	Salariinae	2000-11-16	Pacific				Wallis Island		Wallis and Futuna			Wallis Islands, Ile Uvea, outside SW end of barrier reef, SE of Nukuatea Islet, surge channels with coral, rubble and some sand	-13.3847	-176.238	Williams, J. T.	JTW 2000-21					Wallis Island-2000	Rotenone	8 to 12		Photograph::1		47.6 mm SL photographed by Jeff T. Williams	619502									2014-08-20 19:02:00	http://n2t.net/ark:/65665/39728f0a9-a584-4a3b-a260-708f37d0e24e
USNM	392030	Specimen/Lot		6	Cirripectes variolosus		Cirripectes variolosus : Blenniidae : Perciformes : Actinopterygii : Chordata			Perciformes	Blenniidae	Salariinae	2006-03-11	Pacific		Society Islands		Moorea		French Polynesia			Moorea, Matautia village.	-17.4825	-149.882	Causse, R.; Grignon, J.; Lecchini, D.; Messmer, V.; Planes, S.; Williams, J. T.	Moorea F-06-04	Sample Number : mbio310				Biocode Moorea 2006	Hand net with anaesthetic	2 to 4					2043845									2017-03-21 21:28:00	http://n2t.net/ark:/65665/37bc266cd-521a-4557-b999-d4eae21fc5cc
USNM	397670	Specimen/Lot		1	Cirripectes variolosus		Cirripectes variolosus : Blenniidae : Perciformes : Actinopterygii : Chordata			Perciformes	Blenniidae	Salariinae	24 Sep 1998 (1998 Sep 24 - 0000 00 00; 14:00 - 15:30)	Pacific		Solomon Islands	Duff Islands			Solomon Islands			Solomon Islands, Santa Cruz Islands, Duff Islands, Lakao at northwest end at Temomoa Point in a small cove in surge channels in big boulders.	-9.7983	165.088	Williams, J. T.; Finan, J. F.; McGrouther, M. A.; Bray, D. J.; Westneat, M. W.; Wright, B. W.; Mooi, R. D.; Thacker, C.; Tokopia, M.; Palenga, L.	SOL 98-31	Specimen voucher field number : SOL98:31_28	Butai			Solomon Islands 1998	Rotenone; Dip Net	0 to 10		ETOH FIXED::1			609263									2017-08-29 12:37:00	http://n2t.net/ark:/65665/3531d3f59-1e12-47df-97d7-804adf4e85a8
USNM	400978	Specimen/Lot		1	Cirripectes variolosus		Cirripectes variolosus : Blenniidae : Perciformes : Actinopterygii : Chordata			Perciformes	Blenniidae	Salariinae	2010-09-30	Pacific		Gambier Islands		Taravai		French Polynesia	Tuamotu-Gambier		Gambier Archipelago, Ile Taravai, Pointe Mata O Ruarangi, tidepools and adjacent coral reef, rocky shore woith porous volcanic rock at shore and large table corals in water beneath rocks.	-23.1421	-135.045	Williams, J. T.; Planes, S.; Kulbicki, M. L.; Sasal, P.	GAM-2010-06	Specimen voucher field number : GAM-144	Claymore II			Coralspot, Gambier Islands 2010	rotenone; spear	0 to 2		Photograph::1	Length SL: 65.6mm		2056001									2018-12-03 17:49:00	http://n2t.net/ark:/65665/39cada482-13b2-4295-bd79-b9089a687881
USNM	400978	Genetic Sample		0	Cirripectes variolosus		Cirripectes variolosus : Blenniidae : Perciformes : Actinopterygii : Chordata			Perciformes	Blenniidae	Salariinae	2010-09-30	Pacific		Gambier Islands		Taravai		French Polynesia	Tuamotu-Gambier		Gambier Archipelago, Ile Taravai, Pointe Mata O Ruarangi, tidepools and adjacent coral reef, rocky shore woith porous volcanic rock at shore and large table corals in water beneath rocks.	-23.1421	-135.045	Williams, J. T.; Planes, S.; Kulbicki, M. L.; Sasal, P.	GAM-2010-06	Specimen voucher field number : GAM-144	Claymore II			Coralspot, Gambier Islands 2010	rotenone; spear	0 to 2				Entire tissue sample consumed for DNA extraction.	2056001	Tissue & Parts/Unknown tissue sample		USNM 400978				Yes	SAMPLE DEPLETED IN ENTIRETY	2018-12-03 17:50:00	http://n2t.net/ark:/65665/307c15270-27df-44d8-9b2f-ca4cb53207cc
USNM	400978	Genetic Sample		1	Cirripectes variolosus		Cirripectes variolosus : Blenniidae : Perciformes : Actinopterygii : Chordata			Perciformes	Blenniidae	Salariinae	2010-09-30	Pacific		Gambier Islands		Taravai		French Polynesia	Tuamotu-Gambier		Gambier Archipelago, Ile Taravai, Pointe Mata O Ruarangi, tidepools and adjacent coral reef, rocky shore woith porous volcanic rock at shore and large table corals in water beneath rocks.	-23.1421	-135.045	Williams, J. T.; Planes, S.; Kulbicki, M. L.; Sasal, P.	GAM-2010-06	Specimen voucher field number : GAM-144	Claymore II			Coralspot, Gambier Islands 2010	rotenone; spear	0 to 2					2056001	DNA, RNA, Proteins/Whole genomic DNA	AG9RM88	USNM 400978	GAMBA281-12		Tris-EDTA	No		2018-12-03 17:49:00	http://n2t.net/ark:/65665/37b019807-2346-404c-9145-a81f39af9f7c
USNM	400982	Specimen/Lot		1	Cirripectes variolosus		Cirripectes variolosus : Blenniidae : Perciformes : Actinopterygii : Chordata			Perciformes	Blenniidae	Salariinae	2010-09-30	Pacific		Gambier Islands		Taravai		French Polynesia	Tuamotu-Gambier		Gambier Archipelago, Ile Taravai, Pointe Mata O Ruarangi, tidepools and adjacent coral reef, rocky shore woith porous volcanic rock at shore and large table corals in water beneath rocks.	-23.1421	-135.045	Williams, J. T.; Planes, S.; Kulbicki, M. L.; Sasal, P.	GAM-2010-06	Specimen voucher field number : GAM-145	Claymore II			Coralspot, Gambier Islands 2010	rotenone; spear	0 to 2		Photograph::1	Length SL: 58.1mm		2056001									2018-12-03 17:49:00	http://n2t.net/ark:/65665/3c0f627cd-d1b5-47ce-953e-0dc3ae531484
USNM	400982	Genetic Sample		0	Cirripectes variolosus		Cirripectes variolosus : Blenniidae : Perciformes : Actinopterygii : Chordata			Perciformes	Blenniidae	Salariinae	2010-09-30	Pacific		Gambier Islands		Taravai		French Polynesia	Tuamotu-Gambier		Gambier Archipelago, Ile Taravai, Pointe Mata O Ruarangi, tidepools and adjacent coral reef, rocky shore woith porous volcanic rock at shore and large table corals in water beneath rocks.	-23.1421	-135.045	Williams, J. T.; Planes, S.; Kulbicki, M. L.; Sasal, P.	GAM-2010-06	Specimen voucher field number : GAM-145	Claymore II			Coralspot, Gambier Islands 2010	rotenone; spear	0 to 2				Entire tissue sample consumed for DNA extraction.	2056001	Tissue & Parts/Unknown tissue sample		USNM 400982				Yes	SAMPLE DEPLETED IN ENTIRETY	2018-12-03 17:50:00	http://n2t.net/ark:/65665/35fdf733b-c8a1-4425-85ac-65fb6ddac143
USNM	400982	Genetic Sample		1	Cirripectes variolosus		Cirripectes variolosus : Blenniidae : Perciformes : Actinopterygii : Chordata			Perciformes	Blenniidae	Salariinae	2010-09-30	Pacific		Gambier Islands		Taravai		French Polynesia	Tuamotu-Gambier		Gambier Archipelago, Ile Taravai, Pointe Mata O Ruarangi, tidepools and adjacent coral reef, rocky shore woith porous volcanic rock at shore and large table corals in water beneath rocks.	-23.1421	-135.045	Williams, J. T.; Planes, S.; Kulbicki, M. L.; Sasal, P.	GAM-2010-06	Specimen voucher field number : GAM-145	Claymore II			Coralspot, Gambier Islands 2010	rotenone; spear	0 to 2					2056001	DNA, RNA, Proteins/Whole genomic DNA	AG9RM89	USNM 400982	GAMBA282-12		Tris-EDTA	No		2018-12-03 17:49:00	http://n2t.net/ark:/65665/3d6071431-e514-4292-b33f-c8f3b773daa6
USNM	401138	Specimen/Lot		1	Cirripectes variolosus		Cirripectes variolosus : Blenniidae : Perciformes : Actinopterygii : Chordata			Perciformes	Blenniidae	Salariinae	2010-09-30	Pacific		Gambier Islands		Taravai		French Polynesia	Tuamotu-Gambier		Gambier Archipelago, Ile Taravai, Pointe Mata O Ruarangi, tidepools and adjacent coral reef, rocky shore woith porous volcanic rock at shore and large table corals in water beneath rocks.	-23.1421	-135.045	Williams, J. T.; Planes, S.; Kulbicki, M. L.; Sasal, P.	GAM-2010-06	Specimen voucher field number : GAM-143	Claymore II			Coralspot, Gambier Islands 2010	rotenone; spear	0 to 2		Photograph::1	Length SL: 72.4mm		2056001									2018-12-03 17:49:00	http://n2t.net/ark:/65665/317565feb-3336-4490-b79c-a5845d683cc2
USNM	401138	Genetic Sample		0	Cirripectes variolosus		Cirripectes variolosus : Blenniidae : Perciformes : Actinopterygii : Chordata			Perciformes	Blenniidae	Salariinae	2010-09-30	Pacific		Gambier Islands		Taravai		French Polynesia	Tuamotu-Gambier		Gambier Archipelago, Ile Taravai, Pointe Mata O Ruarangi, tidepools and adjacent coral reef, rocky shore woith porous volcanic rock at shore and large table corals in water beneath rocks.	-23.1421	-135.045	Williams, J. T.; Planes, S.; Kulbicki, M. L.; Sasal, P.	GAM-2010-06	Specimen voucher field number : GAM-143	Claymore II			Coralspot, Gambier Islands 2010	rotenone; spear	0 to 2				Entire tissue sample consumed for DNA extraction.	2056001	Tissue & Parts/Unknown tissue sample		USNM 401138				Yes	SAMPLE DEPLETED IN ENTIRETY	2018-12-03 17:50:00	http://n2t.net/ark:/65665/3b62a4414-0e71-4f2d-8b10-d917f61e9bc3
USNM	401138	Genetic Sample		1	Cirripectes variolosus		Cirripectes variolosus : Blenniidae : Perciformes : Actinopterygii : Chordata			Perciformes	Blenniidae	Salariinae	2010-09-30	Pacific		Gambier Islands		Taravai		French Polynesia	Tuamotu-Gambier		Gambier Archipelago, Ile Taravai, Pointe Mata O Ruarangi, tidepools and adjacent coral reef, rocky shore woith porous volcanic rock at shore and large table corals in water beneath rocks.	-23.1421	-135.045	Williams, J. T.; Planes, S.; Kulbicki, M. L.; Sasal, P.	GAM-2010-06	Specimen voucher field number : GAM-143	Claymore II			Coralspot, Gambier Islands 2010	rotenone; spear	0 to 2					2056001	DNA, RNA, Proteins/Whole genomic DNA	AG9RM87	USNM 401138	GAMBA280-12		Tris-EDTA	No		2018-12-03 17:49:00	http://n2t.net/ark:/65665/3f305ec33-5fb1-44fd-b42b-119d01015095
USNM	404668	Specimen/Lot		1	Cirripectes variolosus		Cirripectes variolosus : Blenniidae : Perciformes : Actinopterygii : Chordata			Perciformes	Blenniidae	Salariinae	2010-10-11	Pacific		Gambier Islands		Teauaone		French Polynesia	Tuamotu-Gambier		Gambier Archipelago, Teauaone Islet, due north of Mangareva, Coral channel in surge zone just next to breakers on barrier reef, rock surge channel.	-23.011	-134.971	Williams, J. T.; Planes, S.; Sasal, P.; Delrieu-Trottin, E.	GAM-2010-38	Specimen voucher field number : GAM-737	Claymore II			Coralspot, Gambier Islands 2010	rotenone; spear	1 to 5		Photograph::1	Length SL: 44.2mm		2056001									2017-03-30 20:11:00	http://n2t.net/ark:/65665/314e9f79b-7ffa-4d5f-a829-9bdb8596e271
USNM	404668	Genetic Sample		0	Cirripectes variolosus		Cirripectes variolosus : Blenniidae : Perciformes : Actinopterygii : Chordata			Perciformes	Blenniidae	Salariinae	2010-10-11	Pacific		Gambier Islands		Teauaone		French Polynesia	Tuamotu-Gambier		Gambier Archipelago, Teauaone Islet, due north of Mangareva, Coral channel in surge zone just next to breakers on barrier reef, rock surge channel.	-23.011	-134.971	Williams, J. T.; Planes, S.; Sasal, P.; Delrieu-Trottin, E.	GAM-2010-38	Specimen voucher field number : GAM-737	Claymore II			Coralspot, Gambier Islands 2010	rotenone; spear	1 to 5				Entire tissue sample consumed for DNA extraction.	2056001	Tissue & Parts/Unknown tissue sample		USNM 404668				Yes	SAMPLE DEPLETED IN ENTIRETY	2018-09-27 17:11:00	http://n2t.net/ark:/65665/3ad8701fe-fd2d-46c2-b1a9-750098253258
USNM	404668	Genetic Sample		1	Cirripectes variolosus		Cirripectes variolosus : Blenniidae : Perciformes : Actinopterygii : Chordata			Perciformes	Blenniidae	Salariinae	2010-10-11	Pacific		Gambier Islands		Teauaone		French Polynesia	Tuamotu-Gambier		Gambier Archipelago, Teauaone Islet, due north of Mangareva, Coral channel in surge zone just next to breakers on barrier reef, rock surge channel.	-23.011	-134.971	Williams, J. T.; Planes, S.; Sasal, P.; Delrieu-Trottin, E.	GAM-2010-38	Specimen voucher field number : GAM-737	Claymore II			Coralspot, Gambier Islands 2010	rotenone; spear	1 to 5					2056001	DNA, RNA, Proteins/Whole genomic DNA	AG9RS71	USNM 404668	GAMBA862-12		Tris-EDTA	No		2017-04-05 18:34:00	http://n2t.net/ark:/65665/390f98ef1-d3ca-4a04-944f-d6b65c9e2b6d
USNM	404702	Specimen/Lot		1	Cirripectes	Cirripectes cf. variolosus	Cirripectes : Blenniidae : Perciformes : Actinopterygii : Chordata			Perciformes	Blenniidae	Salariinae	2010-10-13	Pacific		Gambier Islands		Tarauru-Roa		French Polynesia	Tuamotu-Gambier		Gambier Archipelago, Tarauru-Roa Island, east of Mangareva, outer reef slope off Tarauru-Roa Island, corals with rock and coral rubble in the channels.	-23.1067	-134.854	Williams, J. T.; Planes, S.; Sasal, P.; Delrieu-Trottin, E.	GAM-2010-45	Specimen voucher field number : GAM-791	Claymore II			Coralspot, Gambier Islands 2010	rotenone; spear	10 to 25		Photograph::1	Length SL: 29.3mm		2056001									2017-10-05 20:49:00	http://n2t.net/ark:/65665/318b47b87-3c4e-4b83-802d-e3a687db0c99
USNM	404702	Genetic Sample		0	Cirripectes	Cirripectes cf. variolosus	Cirripectes : Blenniidae : Perciformes : Actinopterygii : Chordata			Perciformes	Blenniidae	Salariinae	2010-10-13	Pacific		Gambier Islands		Tarauru-Roa		French Polynesia	Tuamotu-Gambier		Gambier Archipelago, Tarauru-Roa Island, east of Mangareva, outer reef slope off Tarauru-Roa Island, corals with rock and coral rubble in the channels.	-23.1067	-134.854	Williams, J. T.; Planes, S.; Sasal, P.; Delrieu-Trottin, E.	GAM-2010-45	Specimen voucher field number : GAM-791	Claymore II			Coralspot, Gambier Islands 2010	rotenone; spear	10 to 25				Entire tissue sample consumed for DNA extraction.	2056001	Tissue & Parts/Unknown tissue sample		USNM 404702				Yes	SAMPLE DEPLETED IN ENTIRETY	2018-09-27 17:11:00	http://n2t.net/ark:/65665/3eeb67822-3549-4634-a9bb-c83ca8fa0e65
USNM	404702	Genetic Sample		1	Cirripectes	Cirripectes cf. variolosus	Cirripectes : Blenniidae : Perciformes : Actinopterygii : Chordata			Perciformes	Blenniidae	Salariinae	2010-10-13	Pacific		Gambier Islands		Tarauru-Roa		French Polynesia	Tuamotu-Gambier		Gambier Archipelago, Tarauru-Roa Island, east of Mangareva, outer reef slope off Tarauru-Roa Island, corals with rock and coral rubble in the channels.	-23.1067	-134.854	Williams, J. T.; Planes, S.; Sasal, P.; Delrieu-Trottin, E.	GAM-2010-45	Specimen voucher field number : GAM-791	Claymore II			Coralspot, Gambier Islands 2010	rotenone; spear	10 to 25					2056001	DNA, RNA, Proteins/Whole genomic DNA	AG9RT25	USNM 404702	GAMBA023-12		Tris-EDTA	No		2017-10-05 20:49:00	http://n2t.net/ark:/65665/333efa548-d393-4f49-8986-5236e442bcc9
USNM	404703	Specimen/Lot		1	Cirripectes	Cirripectes cf. variolosus	Cirripectes : Blenniidae : Perciformes : Actinopterygii : Chordata			Perciformes	Blenniidae	Salariinae	2010-10-13	Pacific		Gambier Islands		Tarauru-Roa		French Polynesia	Tuamotu-Gambier		Gambier Archipelago, Tarauru-Roa Island, east of Mangareva, outer reef slope off Tarauru-Roa Island, corals with rock and coral rubble in the channels.	-23.1067	-134.854	Williams, J. T.; Planes, S.; Sasal, P.; Delrieu-Trottin, E.	GAM-2010-45	Specimen voucher field number : GAM-792	Claymore II			Coralspot, Gambier Islands 2010	rotenone; spear	10 to 25		Photograph::1	Length SL: 35mm		2056001									2017-10-05 20:50:00	http://n2t.net/ark:/65665/3b5d92c21-0597-446c-902e-750f33e7c5fc
USNM	404703	Genetic Sample		0	Cirripectes	Cirripectes cf. variolosus	Cirripectes : Blenniidae : Perciformes : Actinopterygii : Chordata			Perciformes	Blenniidae	Salariinae	2010-10-13	Pacific		Gambier Islands		Tarauru-Roa		French Polynesia	Tuamotu-Gambier		Gambier Archipelago, Tarauru-Roa Island, east of Mangareva, outer reef slope off Tarauru-Roa Island, corals with rock and coral rubble in the channels.	-23.1067	-134.854	Williams, J. T.; Planes, S.; Sasal, P.; Delrieu-Trottin, E.	GAM-2010-45	Specimen voucher field number : GAM-792	Claymore II			Coralspot, Gambier Islands 2010	rotenone; spear	10 to 25				Entire tissue sample consumed for DNA extraction.	2056001	Tissue & Parts/Unknown tissue sample		USNM 404703				Yes	SAMPLE DEPLETED IN ENTIRETY	2018-09-27 17:11:00	http://n2t.net/ark:/65665/37672c89d-c594-4d8b-bfc2-7f4b82bf20aa
USNM	404703	Genetic Sample		1	Cirripectes	Cirripectes cf. variolosus	Cirripectes : Blenniidae : Perciformes : Actinopterygii : Chordata			Perciformes	Blenniidae	Salariinae	2010-10-13	Pacific		Gambier Islands		Tarauru-Roa		French Polynesia	Tuamotu-Gambier		Gambier Archipelago, Tarauru-Roa Island, east of Mangareva, outer reef slope off Tarauru-Roa Island, corals with rock and coral rubble in the channels.	-23.1067	-134.854	Williams, J. T.; Planes, S.; Sasal, P.; Delrieu-Trottin, E.	GAM-2010-45	Specimen voucher field number : GAM-792	Claymore II			Coralspot, Gambier Islands 2010	rotenone; spear	10 to 25					2056001	DNA, RNA, Proteins/Whole genomic DNA	AG9RT26	USNM 404703	GAMBA024-12		Tris-EDTA	No		2017-10-05 20:50:00	http://n2t.net/ark:/65665/3b8a5334d-a3af-466b-904f-783861416e00
USNM	404704	Specimen/Lot		1	Cirripectes variolosus		Cirripectes variolosus : Blenniidae : Perciformes : Actinopterygii : Chordata			Perciformes	Blenniidae	Salariinae	2010-10-13	Pacific		Gambier Islands		Tarauru-Roa		French Polynesia	Tuamotu-Gambier		Gambier Archipelago, Tarauru-Roa Island, east of Mangareva, outer reef slope off Tarauru-Roa Island, corals with rock and coral rubble in the channels.	-23.1067	-134.854	Williams, J. T.; Planes, S.; Sasal, P.; Delrieu-Trottin, E.	GAM-2010-45	Specimen voucher field number : GAM-793	Claymore II			Coralspot, Gambier Islands 2010	rotenone; spear	10 to 25		Photograph::1	Length SL: 33.1mm		2056001									2017-03-30 20:11:00	http://n2t.net/ark:/65665/3e06193ef-c4e0-47d0-a387-75e8e7e47159
USNM	404704	Genetic Sample		0	Cirripectes variolosus		Cirripectes variolosus : Blenniidae : Perciformes : Actinopterygii : Chordata			Perciformes	Blenniidae	Salariinae	2010-10-13	Pacific		Gambier Islands		Tarauru-Roa		French Polynesia	Tuamotu-Gambier		Gambier Archipelago, Tarauru-Roa Island, east of Mangareva, outer reef slope off Tarauru-Roa Island, corals with rock and coral rubble in the channels.	-23.1067	-134.854	Williams, J. T.; Planes, S.; Sasal, P.; Delrieu-Trottin, E.	GAM-2010-45	Specimen voucher field number : GAM-793	Claymore II			Coralspot, Gambier Islands 2010	rotenone; spear	10 to 25				Entire tissue sample consumed for DNA extraction.	2056001	Tissue & Parts/Unknown tissue sample		USNM 404704				Yes	SAMPLE DEPLETED IN ENTIRETY	2018-09-27 17:11:00	http://n2t.net/ark:/65665/3b4507cb7-8aff-4c53-8a68-09c4e9b78daf
USNM	404704	Genetic Sample		1	Cirripectes variolosus		Cirripectes variolosus : Blenniidae : Perciformes : Actinopterygii : Chordata			Perciformes	Blenniidae	Salariinae	2010-10-13	Pacific		Gambier Islands		Tarauru-Roa		French Polynesia	Tuamotu-Gambier		Gambier Archipelago, Tarauru-Roa Island, east of Mangareva, outer reef slope off Tarauru-Roa Island, corals with rock and coral rubble in the channels.	-23.1067	-134.854	Williams, J. T.; Planes, S.; Sasal, P.; Delrieu-Trottin, E.	GAM-2010-45	Specimen voucher field number : GAM-793	Claymore II			Coralspot, Gambier Islands 2010	rotenone; spear	10 to 25					2056001	DNA, RNA, Proteins/Whole genomic DNA	AG9RT27	USNM 404704	GAMBA025-12		Tris-EDTA	No		2017-04-05 18:34:00	http://n2t.net/ark:/65665/3a27925de-0433-4df5-a5cc-5ce1fa0bbed9
USNM	404705	Specimen/Lot		1	Cirripectes variolosus		Cirripectes variolosus : Blenniidae : Perciformes : Actinopterygii : Chordata			Perciformes	Blenniidae	Salariinae	2010-10-13	Pacific		Gambier Islands		Tarauru-Roa		French Polynesia	Tuamotu-Gambier		Gambier Archipelago, Tarauru-Roa Island, east of Mangareva, outer reef slope off Tarauru-Roa Island, corals with rock and coral rubble in the channels.	-23.1067	-134.854	Williams, J. T.; Planes, S.; Sasal, P.; Delrieu-Trottin, E.	GAM-2010-45	Specimen voucher field number : GAM-794	Claymore II			Coralspot, Gambier Islands 2010	rotenone; spear	10 to 25		Photograph::1	Length SL: 46.9mm		2056001									2017-03-30 20:11:00	http://n2t.net/ark:/65665/369a62aab-453c-4c7a-bff6-9164370202e9
USNM	404705	Genetic Sample		0	Cirripectes variolosus		Cirripectes variolosus : Blenniidae : Perciformes : Actinopterygii : Chordata			Perciformes	Blenniidae	Salariinae	2010-10-13	Pacific		Gambier Islands		Tarauru-Roa		French Polynesia	Tuamotu-Gambier		Gambier Archipelago, Tarauru-Roa Island, east of Mangareva, outer reef slope off Tarauru-Roa Island, corals with rock and coral rubble in the channels.	-23.1067	-134.854	Williams, J. T.; Planes, S.; Sasal, P.; Delrieu-Trottin, E.	GAM-2010-45	Specimen voucher field number : GAM-794	Claymore II			Coralspot, Gambier Islands 2010	rotenone; spear	10 to 25				Entire tissue sample consumed for DNA extraction.	2056001	Tissue & Parts/Unknown tissue sample		USNM 404705				Yes	SAMPLE DEPLETED IN ENTIRETY	2018-09-27 17:11:00	http://n2t.net/ark:/65665/335a56c6c-ab8b-4bf6-9ea5-809b072b0004
USNM	404705	Genetic Sample		1	Cirripectes variolosus		Cirripectes variolosus : Blenniidae : Perciformes : Actinopterygii : Chordata			Perciformes	Blenniidae	Salariinae	2010-10-13	Pacific		Gambier Islands		Tarauru-Roa		French Polynesia	Tuamotu-Gambier		Gambier Archipelago, Tarauru-Roa Island, east of Mangareva, outer reef slope off Tarauru-Roa Island, corals with rock and coral rubble in the channels.	-23.1067	-134.854	Williams, J. T.; Planes, S.; Sasal, P.; Delrieu-Trottin, E.	GAM-2010-45	Specimen voucher field number : GAM-794	Claymore II			Coralspot, Gambier Islands 2010	rotenone; spear	10 to 25					2056001	DNA, RNA, Proteins/Whole genomic DNA	AG9RT28	USNM 404705	GAMBA026-12		Tris-EDTA	No		2017-04-05 18:34:00	http://n2t.net/ark:/65665/3fc79a00c-a0ca-44c1-9622-38cc2c1442ef
USNM	404817	Specimen/Lot		10	Cirripectes variolosus		Cirripectes variolosus : Blenniidae : Perciformes : Actinopterygii : Chordata			Perciformes	Blenniidae	Salariinae	2008-10-13	Pacific		Marquesas Islands		Mohotane Island		French Polynesia	Marquesas Islands		Marquesas, west coast of Mohotane Island at about middle of island; small bay with about 6 foot swell breaking at top of rock wall, strong surge, large overhangs to sand at base	-9.96042	-138.838	Williams, J. T.; Planes, S.	JTW 2008-02					Marquesas 2008	Rotenone and spear	0 to 9					2049199									2017-10-20 14:28:00	http://n2t.net/ark:/65665/327aa5d3b-a1b0-4cc6-aafc-9d48cc9e65c7
USNM	404897	Specimen/Lot		1	Cirripectes variolosus		Cirripectes variolosus : Blenniidae : Perciformes : Actinopterygii : Chordata			Perciformes	Blenniidae	Salariinae	2008-10-14	Pacific		Marquesas Islands		Mohotane Island		French Polynesia	Marquesas Islands		Marquesas, northwest side of Mohotane Island in tiny partially protected cove, with about 8 foot swell breaking on point; sand slope.	-9.95037	-138.832	Williams, J. T.; Planes, S.	JTW 2008-04					Marquesas 2008	Rotenone and spear	6 to 24					2049199									2017-10-20 14:28:00	http://n2t.net/ark:/65665/3ee842d8e-168a-475f-9a19-f93dba658f29
USNM	404909	Specimen/Lot		1	Cirripectes variolosus		Cirripectes variolosus : Blenniidae : Perciformes : Actinopterygii : Chordata			Perciformes	Blenniidae	Salariinae	2008-10-13	Pacific		Marquesas Islands		Mohotane Island		French Polynesia	Marquesas Islands		Marquesas, southern tip of Mohotane Island in channel between main island and a small islet, rock wall with sand and boulders at base.	-10.0175	-138.804	Williams, J. T.; Planes, S.	JTW 2008-01					Marquesas 2008	Rotenone and spear	5 to 27					2049199									2017-10-20 14:28:00	http://n2t.net/ark:/65665/3a2ab3a73-6cc1-471b-ae24-c60a0f31d507
USNM	407953	Specimen/Lot		1	Cirripectes variolosus		Cirripectes variolosus : Blenniidae : Perciformes : Actinopterygii : Chordata			Perciformes	Blenniidae	Salariinae	26 May 1996 (1996 May 26 - 0000 00 00)	Pacific		Vanuatu Islands		Erromango		Vanuatu			Vanuatu, Erromango, SW Side of Dillon'S Bay, About 200 m Before Reaching Tip of Williams Point. Narrow Reef Shelf At Base of Rocky Cliff With Deep Surge Channels.	-18.9428	168.993	Williams, J. T.; Smith, D. G.; Westneat, M. W.; McGrouther, M. A.; Jimmy, R.	JTW 96-9; VANUATU-10; MW 96-6		Mv Lewia			Vanuatu Expedition		0 to 6					417715									2017-10-20 14:28:00	http://n2t.net/ark:/65665/3e5ddb8f2-8b11-4ef4-ae95-fbe2b57d27af
USNM	408248	Specimen/Lot		1	Cirripectes variolosus		Cirripectes variolosus : Blenniidae : Perciformes : Actinopterygii : Chordata			Perciformes	Blenniidae	Salariinae	2006-06-24	Pacific				Mururoa Atoll		French Polynesia			Mururoa Atoll, patch and adjacent fringing reef near shore at north end of lagoon, coral, rock and sand	-21.7819	-138.886	Williams, J. T.	JTW 2006-03					Mururoa 2006	Rotenone and spear	0 to 4		Photograph::1	SL: 70.7mm		2041507									2016-02-05 14:29:00	http://n2t.net/ark:/65665/30879a2fa-d8b5-4cbb-8d02-df415d6e8287
USNM	409071	Specimen/Lot		1	Cirripectes variolosus		Cirripectes variolosus : Blenniidae : Perciformes : Actinopterygii : Chordata			Perciformes	Blenniidae	Salariinae	2011-10-27	Pacific		Marquesas Islands		Nuku Hiva		French Polynesia	Marquesas Islands		Marquesas, Nuku Hiva, Hatihou.	-8.82508	-140.064	Williams, J. T.; Planes, S.; Delrieu-Trottin, E.; Sasal, P.; Mourier, J.; Veuille, M.; Galzin, R.; Lison de Loma, T.; Mou-Tham, G.	MARQ-2011-04	Specimen voucher field number : MARQ-071	Braveheart			Coralspot, Marquesas 2011	rotenone; spear	3 to 6		Photograph::1	Length SL: 66mm	SL = 66 mm.	2061003									2019-06-21 12:52:00	http://n2t.net/ark:/65665/3907e6984-8b80-407f-a61b-a315f4bf37a6
USNM	409071	Genetic Sample		1	Cirripectes variolosus		Cirripectes variolosus : Blenniidae : Perciformes : Actinopterygii : Chordata			Perciformes	Blenniidae	Salariinae	2011-10-27	Pacific		Marquesas Islands		Nuku Hiva		French Polynesia	Marquesas Islands		Marquesas, Nuku Hiva, Hatihou.	-8.82508	-140.064	Williams, J. T.; Planes, S.; Delrieu-Trottin, E.; Sasal, P.; Mourier, J.; Veuille, M.; Galzin, R.; Lison de Loma, T.; Mou-Tham, G.	MARQ-2011-04	Specimen voucher field number : MARQ-071	Braveheart			Coralspot, Marquesas 2011	rotenone; spear	3 to 6					2061003	Tissue & Parts/Unknown tissue sample	AH1TS07	USNM 409071			DMSO-EDTA	No		2019-06-21 12:52:00	http://n2t.net/ark:/65665/331932458-30e0-4e21-aecd-c0fdec5c71f3
USNM	409071	Genetic Sample		1	Cirripectes variolosus		Cirripectes variolosus : Blenniidae : Perciformes : Actinopterygii : Chordata			Perciformes	Blenniidae	Salariinae	2011-10-27	Pacific		Marquesas Islands		Nuku Hiva		French Polynesia	Marquesas Islands		Marquesas, Nuku Hiva, Hatihou.	-8.82508	-140.064	Williams, J. T.; Planes, S.; Delrieu-Trottin, E.; Sasal, P.; Mourier, J.; Veuille, M.; Galzin, R.; Lison de Loma, T.; Mou-Tham, G.	MARQ-2011-04	Specimen voucher field number : MARQ-071	Braveheart			Coralspot, Marquesas 2011	rotenone; spear	3 to 6					2061003	DNA, RNA, Proteins/Whole genomic DNA	AG7PU81	USNM 409071	MARQ071-12		Tris-EDTA	No		2019-06-21 12:52:00	http://n2t.net/ark:/65665/30385c1cc-4788-418c-9ee0-b2a06b09c196
USNM	409072	Specimen/Lot		1	Cirripectes variolosus		Cirripectes variolosus : Blenniidae : Perciformes : Actinopterygii : Chordata			Perciformes	Blenniidae	Salariinae	2011-10-27	Pacific		Marquesas Islands		Nuku Hiva		French Polynesia	Marquesas Islands		Marquesas, Nuku Hiva, Hatihou.	-8.82508	-140.064	Williams, J. T.; Planes, S.; Delrieu-Trottin, E.; Sasal, P.; Mourier, J.; Veuille, M.; Galzin, R.; Lison de Loma, T.; Mou-Tham, G.	MARQ-2011-04	Specimen voucher field number : MARQ-072	Braveheart			Coralspot, Marquesas 2011	rotenone; spear	3 to 6		Photograph::1	Length SL: 61mm	SL = 61 mm.	2061003									2019-06-21 12:52:00	http://n2t.net/ark:/65665/32e1576a8-e7d4-435d-890a-51e1bed6ea04
USNM	409072	Genetic Sample		1	Cirripectes variolosus		Cirripectes variolosus : Blenniidae : Perciformes : Actinopterygii : Chordata			Perciformes	Blenniidae	Salariinae	2011-10-27	Pacific		Marquesas Islands		Nuku Hiva		French Polynesia	Marquesas Islands		Marquesas, Nuku Hiva, Hatihou.	-8.82508	-140.064	Williams, J. T.; Planes, S.; Delrieu-Trottin, E.; Sasal, P.; Mourier, J.; Veuille, M.; Galzin, R.; Lison de Loma, T.; Mou-Tham, G.	MARQ-2011-04	Specimen voucher field number : MARQ-072	Braveheart			Coralspot, Marquesas 2011	rotenone; spear	3 to 6					2061003	Tissue & Parts/Unknown tissue sample	AH1TS08	USNM 409072			DMSO-EDTA	No		2019-06-21 12:52:00	http://n2t.net/ark:/65665/311fa5a5d-20f9-4e16-bd05-0376d8311928
USNM	409072	Genetic Sample		1	Cirripectes variolosus		Cirripectes variolosus : Blenniidae : Perciformes : Actinopterygii : Chordata			Perciformes	Blenniidae	Salariinae	2011-10-27	Pacific		Marquesas Islands		Nuku Hiva		French Polynesia	Marquesas Islands		Marquesas, Nuku Hiva, Hatihou.	-8.82508	-140.064	Williams, J. T.; Planes, S.; Delrieu-Trottin, E.; Sasal, P.; Mourier, J.; Veuille, M.; Galzin, R.; Lison de Loma, T.; Mou-Tham, G.	MARQ-2011-04	Specimen voucher field number : MARQ-072	Braveheart			Coralspot, Marquesas 2011	rotenone; spear	3 to 6					2061003	DNA, RNA, Proteins/Whole genomic DNA	AG7PU82	USNM 409072	MARQ072-12		Tris-EDTA	No		2019-06-21 12:52:00	http://n2t.net/ark:/65665/30c67d7aa-d130-4c31-b948-3e59d2ab0ff9
USNM	409073	Specimen/Lot		1	Cirripectes variolosus		Cirripectes variolosus : Blenniidae : Perciformes : Actinopterygii : Chordata			Perciformes	Blenniidae	Salariinae	2011-10-27	Pacific		Marquesas Islands		Nuku Hiva		French Polynesia	Marquesas Islands		Marquesas, Nuku Hiva, Hatihou.	-8.82508	-140.064	Williams, J. T.; Planes, S.; Delrieu-Trottin, E.; Sasal, P.; Mourier, J.; Veuille, M.; Galzin, R.; Lison de Loma, T.; Mou-Tham, G.	MARQ-2011-04	Specimen voucher field number : MARQ-073	Braveheart			Coralspot, Marquesas 2011	rotenone; spear	3 to 6		Photograph::1	Length SL: 72mm	SL = 72 mm.	2061003									2019-06-21 12:52:00	http://n2t.net/ark:/65665/3ba50d0e4-1f65-49b6-aaae-d53189e025bd
USNM	409073	Genetic Sample		1	Cirripectes variolosus		Cirripectes variolosus : Blenniidae : Perciformes : Actinopterygii : Chordata			Perciformes	Blenniidae	Salariinae	2011-10-27	Pacific		Marquesas Islands		Nuku Hiva		French Polynesia	Marquesas Islands		Marquesas, Nuku Hiva, Hatihou.	-8.82508	-140.064	Williams, J. T.; Planes, S.; Delrieu-Trottin, E.; Sasal, P.; Mourier, J.; Veuille, M.; Galzin, R.; Lison de Loma, T.; Mou-Tham, G.	MARQ-2011-04	Specimen voucher field number : MARQ-073	Braveheart			Coralspot, Marquesas 2011	rotenone; spear	3 to 6					2061003	Tissue & Parts/Unknown tissue sample	AH1TS09	USNM 409073			DMSO-EDTA	No		2019-06-21 12:52:00	http://n2t.net/ark:/65665/30e88c86f-0258-476d-8574-37ecf638118b
USNM	409073	Genetic Sample		1	Cirripectes variolosus		Cirripectes variolosus : Blenniidae : Perciformes : Actinopterygii : Chordata			Perciformes	Blenniidae	Salariinae	2011-10-27	Pacific		Marquesas Islands		Nuku Hiva		French Polynesia	Marquesas Islands		Marquesas, Nuku Hiva, Hatihou.	-8.82508	-140.064	Williams, J. T.; Planes, S.; Delrieu-Trottin, E.; Sasal, P.; Mourier, J.; Veuille, M.; Galzin, R.; Lison de Loma, T.; Mou-Tham, G.	MARQ-2011-04	Specimen voucher field number : MARQ-073	Braveheart			Coralspot, Marquesas 2011	rotenone; spear	3 to 6					2061003	DNA, RNA, Proteins/Whole genomic DNA	AG7PU83	USNM 409073	MARQ073-12		Tris-EDTA	No		2019-06-21 12:52:00	http://n2t.net/ark:/65665/375e1b084-2b16-4606-ac4b-1a06e283fbc6
USNM	409074	Specimen/Lot		1	Cirripectes variolosus		Cirripectes variolosus : Blenniidae : Perciformes : Actinopterygii : Chordata			Perciformes	Blenniidae	Salariinae	2011-10-27	Pacific		Marquesas Islands		Nuku Hiva		French Polynesia	Marquesas Islands		Marquesas, Nuku Hiva, Hatihou.	-8.82508	-140.064	Williams, J. T.; Planes, S.; Delrieu-Trottin, E.; Sasal, P.; Mourier, J.; Veuille, M.; Galzin, R.; Lison de Loma, T.; Mou-Tham, G.	MARQ-2011-04	Specimen voucher field number : MARQ-074	Braveheart			Coralspot, Marquesas 2011	rotenone; spear	3 to 6		Photograph::1	Length SL: 74mm	SL = 74 mm.	2061003									2019-06-21 12:52:00	http://n2t.net/ark:/65665/36fa1150c-7b32-4905-918e-d602737c2aa9
USNM	409074	Genetic Sample		1	Cirripectes variolosus		Cirripectes variolosus : Blenniidae : Perciformes : Actinopterygii : Chordata			Perciformes	Blenniidae	Salariinae	2011-10-27	Pacific		Marquesas Islands		Nuku Hiva		French Polynesia	Marquesas Islands		Marquesas, Nuku Hiva, Hatihou.	-8.82508	-140.064	Williams, J. T.; Planes, S.; Delrieu-Trottin, E.; Sasal, P.; Mourier, J.; Veuille, M.; Galzin, R.; Lison de Loma, T.; Mou-Tham, G.	MARQ-2011-04	Specimen voucher field number : MARQ-074	Braveheart			Coralspot, Marquesas 2011	rotenone; spear	3 to 6					2061003	Tissue & Parts/Unknown tissue sample	AH1TS10	USNM 409074			DMSO-EDTA	No		2019-06-21 12:52:00	http://n2t.net/ark:/65665/3b4405485-a978-44b2-8a91-45b539bb0875
USNM	409074	Genetic Sample		1	Cirripectes variolosus		Cirripectes variolosus : Blenniidae : Perciformes : Actinopterygii : Chordata			Perciformes	Blenniidae	Salariinae	2011-10-27	Pacific		Marquesas Islands		Nuku Hiva		French Polynesia	Marquesas Islands		Marquesas, Nuku Hiva, Hatihou.	-8.82508	-140.064	Williams, J. T.; Planes, S.; Delrieu-Trottin, E.; Sasal, P.; Mourier, J.; Veuille, M.; Galzin, R.; Lison de Loma, T.; Mou-Tham, G.	MARQ-2011-04	Specimen voucher field number : MARQ-074	Braveheart			Coralspot, Marquesas 2011	rotenone; spear	3 to 6					2061003	DNA, RNA, Proteins/Whole genomic DNA	AG7PU84	USNM 409074	MARQ074-12		Tris-EDTA	No		2019-06-21 12:52:00	http://n2t.net/ark:/65665/34cdc2bb8-96e8-4b52-a43b-c4b437361f36
USNM	409139	Specimen/Lot		1	Cirripectes	Cirripectes cf. variolosus	Cirripectes : Blenniidae : Perciformes : Actinopterygii : Chordata			Perciformes	Blenniidae	Salariinae	2011-10-28	Pacific		Marquesas Islands		Clark Bank		French Polynesia	Marquesas Islands		Marquesas, Banc Clark.	-8.08928	-139.635	Williams, J. T.; Planes, S.; Delrieu-Trottin, E.; Sasal, P.; Mourier, J.; Veuille, M.; Galzin, R.; Lison de Loma, T.; Mou-Tham, G.	MARQ-2011-06	Specimen voucher field number : MARQ-139	Braveheart			Coralspot, Marquesas 2011	rotenone; spear	17 to 32		Photograph::1	Length SL: 60mm	SL = 60 mm.	2061003									2019-06-21 12:52:00	http://n2t.net/ark:/65665/3d59be474-06b5-4720-9b6c-0620ba117e07
USNM	409139	Genetic Sample		1	Cirripectes	Cirripectes cf. variolosus	Cirripectes : Blenniidae : Perciformes : Actinopterygii : Chordata			Perciformes	Blenniidae	Salariinae	2011-10-28	Pacific		Marquesas Islands		Clark Bank		French Polynesia	Marquesas Islands		Marquesas, Banc Clark.	-8.08928	-139.635	Williams, J. T.; Planes, S.; Delrieu-Trottin, E.; Sasal, P.; Mourier, J.; Veuille, M.; Galzin, R.; Lison de Loma, T.; Mou-Tham, G.	MARQ-2011-06	Specimen voucher field number : MARQ-139	Braveheart			Coralspot, Marquesas 2011	rotenone; spear	17 to 32					2061003	Tissue & Parts/Unknown tissue sample	AH1TS75	USNM 409139			DMSO-EDTA	No		2019-06-21 12:52:00	http://n2t.net/ark:/65665/3f9a51b24-5497-4dc4-b3f8-8aa1d26bc785
USNM	409139	Genetic Sample		1	Cirripectes	Cirripectes cf. variolosus	Cirripectes : Blenniidae : Perciformes : Actinopterygii : Chordata			Perciformes	Blenniidae	Salariinae	2011-10-28	Pacific		Marquesas Islands		Clark Bank		French Polynesia	Marquesas Islands		Marquesas, Banc Clark.	-8.08928	-139.635	Williams, J. T.; Planes, S.; Delrieu-Trottin, E.; Sasal, P.; Mourier, J.; Veuille, M.; Galzin, R.; Lison de Loma, T.; Mou-Tham, G.	MARQ-2011-06	Specimen voucher field number : MARQ-139	Braveheart			Coralspot, Marquesas 2011	rotenone; spear	17 to 32					2061003	DNA, RNA, Proteins/Whole genomic DNA	AG7PV48	USNM 409139	MARQ139-12		Tris-EDTA	No		2019-06-21 12:52:00	http://n2t.net/ark:/65665/3c40d7f9b-e91e-4598-ae20-6762ef8aa46d
USNM	409140	Specimen/Lot		1	Cirripectes	Cirripectes cf. variolosus	Cirripectes : Blenniidae : Perciformes : Actinopterygii : Chordata			Perciformes	Blenniidae	Salariinae	2011-10-28	Pacific		Marquesas Islands		Clark Bank		French Polynesia	Marquesas Islands		Marquesas, Banc Clark.	-8.08928	-139.635	Williams, J. T.; Planes, S.; Delrieu-Trottin, E.; Sasal, P.; Mourier, J.; Veuille, M.; Galzin, R.; Lison de Loma, T.; Mou-Tham, G.	MARQ-2011-06	Specimen voucher field number : MARQ-140	Braveheart			Coralspot, Marquesas 2011	rotenone; spear	17 to 32		Photograph::1	Length SL: 41mm	SL = 41 mm.	2061003									2019-06-21 12:52:00	http://n2t.net/ark:/65665/3dfcf72b4-d17d-4bb6-a416-691f48316dc6
USNM	409140	Genetic Sample		1	Cirripectes	Cirripectes cf. variolosus	Cirripectes : Blenniidae : Perciformes : Actinopterygii : Chordata			Perciformes	Blenniidae	Salariinae	2011-10-28	Pacific		Marquesas Islands		Clark Bank		French Polynesia	Marquesas Islands		Marquesas, Banc Clark.	-8.08928	-139.635	Williams, J. T.; Planes, S.; Delrieu-Trottin, E.; Sasal, P.; Mourier, J.; Veuille, M.; Galzin, R.; Lison de Loma, T.; Mou-Tham, G.	MARQ-2011-06	Specimen voucher field number : MARQ-140	Braveheart			Coralspot, Marquesas 2011	rotenone; spear	17 to 32					2061003	Tissue & Parts/Unknown tissue sample	AH1TS76	USNM 409140			DMSO-EDTA	No		2019-06-21 12:52:00	http://n2t.net/ark:/65665/3e09681e7-321c-4a3d-8648-a2b4a333274c
USNM	409140	Genetic Sample		1	Cirripectes	Cirripectes cf. variolosus	Cirripectes : Blenniidae : Perciformes : Actinopterygii : Chordata			Perciformes	Blenniidae	Salariinae	2011-10-28	Pacific		Marquesas Islands		Clark Bank		French Polynesia	Marquesas Islands		Marquesas, Banc Clark.	-8.08928	-139.635	Williams, J. T.; Planes, S.; Delrieu-Trottin, E.; Sasal, P.; Mourier, J.; Veuille, M.; Galzin, R.; Lison de Loma, T.; Mou-Tham, G.	MARQ-2011-06	Specimen voucher field number : MARQ-140	Braveheart			Coralspot, Marquesas 2011	rotenone; spear	17 to 32					2061003	DNA, RNA, Proteins/Whole genomic DNA	AG7PV49	USNM 409140	MARQ140-12		Tris-EDTA	No		2019-06-21 12:52:00	http://n2t.net/ark:/65665/39965ac37-9237-4871-aec6-8b1881bec2ab
USNM	411118	Specimen/Lot		1	Cirripectes variolosus		Cirripectes variolosus : Blenniidae : Perciformes : Actinopterygii : Chordata			Perciformes	Blenniidae	Salariinae	2011-11-02	Pacific		Marquesas Islands		Motu Iti		French Polynesia	Marquesas Islands		Marquesas, Motu Iti.	-8.682	-140.602	Williams, J. T.; Planes, S.; Delrieu-Trottin, E.	MARQ-2011-18		Braveheart			Coralspot, Marquesas 2011	Rotenone	20 to 25					2061003									2014-08-20 19:20:00	http://n2t.net/ark:/65665/36a84ff15-3066-430d-a344-8dd2031c7353
USNM	411462	Specimen/Lot		2	Cirripectes variolosus		Cirripectes variolosus : Blenniidae : Perciformes : Actinopterygii : Chordata			Perciformes	Blenniidae	Salariinae	2008-10-15	Pacific		Marquesas Islands		Mohotane Island		French Polynesia	Marquesas Islands		Marquesas, northwest side of Mohotane Island in tiny partially protected cove, with about 6 foot swell breaking on point; rock wall extending from near shore break to about 20 m, collection made at base of rock wall and on sand and rubble at base.	-9.95037	-138.832	Williams, J. T.; Planes, S.	JTW 2008-05					Marquesas 2008	Rotenone and spear	6 to 20					2049199									2016-02-05 14:29:00	http://n2t.net/ark:/65665/341d18d9e-e68d-4ad4-be15-75b8385fa73d
USNM	411463	Specimen/Lot		5	Cirripectes variolosus		Cirripectes variolosus : Blenniidae : Perciformes : Actinopterygii : Chordata			Perciformes	Blenniidae	Salariinae	2008-10-13	Pacific		Marquesas Islands		Mohotane Island		French Polynesia	Marquesas Islands		Marquesas, southern tip of Mohotane Island in channel between main island and a small islet, rock wall with sand and boulders at base.	-10.0175	-138.804	Williams, J. T.; Planes, S.	JTW 2008-01					Marquesas 2008	Rotenone and spear	5 to 27					2049199									2016-02-05 14:29:00	http://n2t.net/ark:/65665/3692373ca-eaf1-407c-bd03-ad02908bc9ec
USNM	411510	Specimen/Lot		2	Cirripectes variolosus		Cirripectes variolosus : Blenniidae : Perciformes : Actinopterygii : Chordata			Perciformes	Blenniidae	Salariinae	2011-11-11	Pacific		Marquesas Islands		Fatu Hiva		French Polynesia	Marquesas Islands		Marquesas, Fatu Hiva, northwest end of island, small bay on south side of Pointe Teohootefau on south side of harbor.	-10.442	-138.684	Williams, J. T.; Planes, S.; Delrieu-Trottin, E.; Sasal, P.; Mourier, J.; Cribb, T.	MARQ-2011-34		Braveheart			Coralspot, Marquesas 2011	Rotenone	10 to 28					2061003									2014-08-20 19:20:00	http://n2t.net/ark:/65665/326344f75-5398-47fa-b231-6d27824b778e
USNM	411511	Specimen/Lot		12	Cirripectes variolosus		Cirripectes variolosus : Blenniidae : Perciformes : Actinopterygii : Chordata			Perciformes	Blenniidae	Salariinae	2011-11-11	Pacific		Marquesas Islands		Fatu Hiva		French Polynesia	Marquesas Islands		Marquesas, Fatu Hiva, northwest end of island, small bay on south side of Pointe Teohootefau on south side of harbor.	-10.442	-138.684	Williams, J. T.; Planes, S.; Delrieu-Trottin, E.; Sasal, P.; Mourier, J.; Cribb, T.	MARQ-2011-34		Braveheart			Coralspot, Marquesas 2011	Rotenone	10 to 28					2061003									2014-08-20 19:20:00	http://n2t.net/ark:/65665/33bbe4571-ba6c-4c84-a659-6aa0f692af68
USNM	412102	Specimen/Lot		1	Cirripectes variolosus		Cirripectes variolosus : Blenniidae : Perciformes : Actinopterygii : Chordata			Perciformes	Blenniidae	Salariinae	2010-10-11	Pacific		Gambier Islands		Teauaone		French Polynesia	Tuamotu-Gambier		Gambier Archipelago, Teauaone Islet, due north of Mangareva, Coral channel in surge zone just next to breakers on barrier reef, rock surge channel.	-23.011	-134.971	Williams, J. T.; Planes, S.; Sasal, P.; Delrieu-Trottin, E.	GAM-2010-38		Claymore II			Coralspot, Gambier Islands 2010	rotenone; spear	1 to 5					2056001									2016-02-05 14:29:00	http://n2t.net/ark:/65665/33b16d6de-b893-4135-bfa3-0160e5af4280
USNM	412114	Specimen/Lot		8	Cirripectes variolosus		Cirripectes variolosus : Blenniidae : Perciformes : Actinopterygii : Chordata			Perciformes	Blenniidae	Salariinae	2011-11-04	Pacific		Marquesas Islands		Ua Pou		French Polynesia	Marquesas Islands		Marquesas, Ua Pou, cape of Punahu, west side of island.	-9.381	-140.136	Williams, J. T.; Planes, S.; Delrieu-Trottin, E.; Sasal, P.; Mourier, J.	MARQ-2011-19		Braveheart			Coralspot, Marquesas 2011	Rotenone	19 to 30					2061003									2014-08-20 19:20:00	http://n2t.net/ark:/65665/33d59ba8d-3f00-4797-904c-cfec0d44882b
USNM	412115	Specimen/Lot		4	Cirripectes variolosus		Cirripectes variolosus : Blenniidae : Perciformes : Actinopterygii : Chordata			Perciformes	Blenniidae	Salariinae	2011-10-28	Pacific		Marquesas Islands		Clark Bank		French Polynesia	Marquesas Islands		Marquesas, Banc Clark.	-8.08928	-139.635	Williams, J. T.; Planes, S.; Delrieu-Trottin, E.; Sasal, P.; Mourier, J.; Veuille, M.; Galzin, R.; Lison de Loma, T.; Mou-Tham, G.	MARQ-2011-06		Braveheart			Coralspot, Marquesas 2011	rotenone; spear	17 to 32					2061003									2019-06-21 12:52:00	http://n2t.net/ark:/65665/325cad1a9-bc81-403a-acdb-c3bf27c4e238
USNM	412116	Specimen/Lot		1	Cirripectes variolosus		Cirripectes variolosus : Blenniidae : Perciformes : Actinopterygii : Chordata			Perciformes	Blenniidae	Salariinae	25 Oct 2011 to 15 Nov 2011	Pacific		Marquesas Islands				French Polynesia	Marquesas Islands		Marquesas Islands.			Williams, J. T.; Planes, S.; Delrieu-Trottin, E.			Braveheart			Coralspot, Marquesas 2011							2061003									2014-08-20 19:20:00	http://n2t.net/ark:/65665/31c3d5c72-5e08-49a7-a73e-2e6f1a75b572
USNM	412117	Specimen/Lot		3	Cirripectes variolosus		Cirripectes variolosus : Blenniidae : Perciformes : Actinopterygii : Chordata			Perciformes	Blenniidae	Salariinae	2011-11-08	Pacific		Marquesas Islands		Hiva Oa		French Polynesia	Marquesas Islands		Marquesas, Hiva Oa, Tepaapaa, on south end of island.	-9.84072	-139.115	Williams, J. T.; Planes, S.; Delrieu-Trottin, E.; Sasal, P.; Mourier, J.	MARQ-2011-28		Braveheart			Coralspot, Marquesas 2011	Rotenone	15 to 36					2061003									2014-08-20 19:20:00	http://n2t.net/ark:/65665/31a0ceeef-789a-470d-add9-70daf0419e68
USNM	412118	Specimen/Lot		2	Cirripectes variolosus		Cirripectes variolosus : Blenniidae : Perciformes : Actinopterygii : Chordata			Perciformes	Blenniidae	Salariinae	2011-11-14	Pacific		Marquesas Islands		Ua Huka		French Polynesia	Marquesas Islands		Marquesas, Ua Huka, northeast end of island at Kohai islet on east end.	-8.86333	-139.593	Williams, J. T.; Planes, S.; Delrieu-Trottin, E.; Sasal, P.; Mourier, J.	MARQ-2011-40		Braveheart			Coralspot, Marquesas 2011	Rotenone	18 to 30					2061003									2014-08-20 19:20:00	http://n2t.net/ark:/65665/30c8d5c2a-30fe-427c-a955-40ded93efbf1
USNM	412119	Specimen/Lot		25	Cirripectes variolosus		Cirripectes variolosus : Blenniidae : Perciformes : Actinopterygii : Chordata			Perciformes	Blenniidae	Salariinae	2011-11-07	Pacific		Marquesas Islands		Tahuata		French Polynesia	Marquesas Islands		Marquesas, Tahuata, Meauteivi, on north end of island in small bay.	-9.89353	-139.084	Williams, J. T.; Planes, S.; Delrieu-Trottin, E.; Sasal, P.; Mourier, J.	MARQ-2011-26		Braveheart			Coralspot, Marquesas 2011	Rotenone	0 to 4					2061003									2014-08-20 19:20:00	http://n2t.net/ark:/65665/38493377a-d2bd-4974-b4b4-f9d2d8bd179a
USNM	412121	Specimen/Lot		4	Cirripectes variolosus		Cirripectes variolosus : Blenniidae : Perciformes : Actinopterygii : Chordata			Perciformes	Blenniidae	Salariinae	2011-10-28	Pacific		Marquesas Islands		Clark Bank		French Polynesia	Marquesas Islands		Marquesas, Banc Clark.	-8.08928	-139.635	Williams, J. T.; Planes, S.; Delrieu-Trottin, E.; Sasal, P.; Mourier, J.; Veuille, M.; Galzin, R.; Lison de Loma, T.; Mou-Tham, G.	MARQ-2011-08		Braveheart			Coralspot, Marquesas 2011	Rotenone	15 to 35					2061003									2019-06-21 12:52:00	http://n2t.net/ark:/65665/3e51cc823-23b1-4341-a3dd-4e3ddd41669f
USNM	412123	Specimen/Lot		6	Cirripectes variolosus		Cirripectes variolosus : Blenniidae : Perciformes : Actinopterygii : Chordata			Perciformes	Blenniidae	Salariinae	2011-11-01	Pacific		Marquesas Islands		Motu One		French Polynesia	Marquesas Islands		Marquesas, Motu One, west side.	-7.85711	-140.373	Williams, J. T.; Planes, S.; Delrieu-Trottin, E.; Sasal, P.; Mourier, J.; Veuille, M.; Galzin, R.; Lison de Loma, T.; Mou-Tham, G.	MARQ-2011-16		Braveheart			Coralspot, Marquesas 2011	Rotenone	7 to 9					2061003									2019-06-21 12:52:00	http://n2t.net/ark:/65665/377c9c4c9-ba52-4b75-bd7c-257485c618fe
USNM	412124	Specimen/Lot		19	Cirripectes variolosus		Cirripectes variolosus : Blenniidae : Perciformes : Actinopterygii : Chordata			Perciformes	Blenniidae	Salariinae	2008-10-16	Pacific		Marquesas Islands		Mohotane Island		French Polynesia	Marquesas Islands		Marquesas, southwest side of Mohotane Island, Heavy shore break at base of vertical cliff with about 10- foot swells breaking on rock wall, small groove in vertical rock wall to large lava tube cave at base of wall.	-10.006	-138.829	Williams, J. T.; Planes, S.	JTW 2008-07					Marquesas 2008	Rotenone and spear	6 to 24					2049199									2016-02-05 14:29:00	http://n2t.net/ark:/65665/34b8aaf7b-80ab-41bd-a135-1a7ed1605e3e
USNM	412125	Specimen/Lot		4	Cirripectes variolosus		Cirripectes variolosus : Blenniidae : Perciformes : Actinopterygii : Chordata			Perciformes	Blenniidae	Salariinae	2011-11-10	Pacific		Marquesas Islands		Fatu Hiva		French Polynesia	Marquesas Islands		Marquesas, Fatu Hiva, south of Baie Hanavave (Baie des Vierges) at tip of Pointe Matautu.	-10.4715	-138.678	Williams, J. T.; Planes, S.; Delrieu-Trottin, E.; Sasal, P.; Mourier, J.; Cribb, T.	MARQ-2011-32		Braveheart			Coralspot, Marquesas 2011	Rotenone	20 to 30					2061003									2014-08-20 19:20:00	http://n2t.net/ark:/65665/3f070ea0e-d754-49b0-8d5d-74fadb8ef692
USNM	412126	Specimen/Lot		4	Cirripectes variolosus		Cirripectes variolosus : Blenniidae : Perciformes : Actinopterygii : Chordata			Perciformes	Blenniidae	Salariinae	2011-11-02	Pacific		Marquesas Islands		Motu Iti		French Polynesia	Marquesas Islands		Marquesas, Motu Iti, west side.	-8.67669	-140.621	Williams, J. T.; Planes, S.; Delrieu-Trottin, E.; Sasal, P.; Mourier, J.	MARQ-2011-17		Braveheart			Coralspot, Marquesas 2011	Rotenone	0 to 10					2061003									2014-08-20 19:20:00	http://n2t.net/ark:/65665/3b7cd798f-a038-4642-98f8-9343c241a6c2
USNM	412128	Specimen/Lot		1	Cirripectes variolosus		Cirripectes variolosus : Blenniidae : Perciformes : Actinopterygii : Chordata			Perciformes	Blenniidae	Salariinae	2011-11-13	Pacific		Marquesas Islands		Fatu Huku		French Polynesia	Marquesas Islands		Marquesas, Fatu Huku, northwest side of island just north of the western tip.	-9.43311	-138.931	Williams, J. T.; Planes, S.; Delrieu-Trottin, E.; Sasal, P.; Mourier, J.	MARQ-2011-38		Braveheart			Coralspot, Marquesas 2011	Rotenone	17 to 30					2061003									2014-08-20 19:20:00	http://n2t.net/ark:/65665/3616c23b5-1edf-4c41-add5-b0e5375c5f64
USNM	412130	Specimen/Lot		1	Cirripectes variolosus		Cirripectes variolosus : Blenniidae : Perciformes : Actinopterygii : Chordata			Perciformes	Blenniidae	Salariinae	2011-10-26	Pacific		Marquesas Islands		Nuku Hiva		French Polynesia	Marquesas Islands		Marquesas, Nuku Hiva, Uea, west coast.	-8.92844	-140.225	Planes, S.; Sasal, P.; Mourier, J.	MARQ-2011-02		Braveheart			Coralspot, Marquesas 2011	Spear	20 to 40					2061003									2014-08-20 19:20:00	http://n2t.net/ark:/65665/31633e67f-0cc8-40ef-b943-956890f2f813
USNM	412131	Specimen/Lot		7	Cirripectes variolosus		Cirripectes variolosus : Blenniidae : Perciformes : Actinopterygii : Chordata			Perciformes	Blenniidae	Salariinae	2011-10-31	Pacific		Marquesas Islands		Hatuta'a		French Polynesia	Marquesas Islands		Marquesas, Hatuta'a, North Rock	-7.89636	-140.562	Williams, J. T.; Planes, S.; Delrieu-Trottin, E.; Sasal, P.; Mourier, J.; Veuille, M.; Galzin, R.; Lison de Loma, T.; Mou-Tham, G.	MARQ-2011-13		Braveheart			Coralspot, Marquesas 2011	Rotenone						2061003									2019-06-21 12:52:00	http://n2t.net/ark:/65665/3efbfb7bb-5879-4b60-9196-2c1765eb9e5f
USNM	412132	Specimen/Lot		3	Cirripectes variolosus		Cirripectes variolosus : Blenniidae : Perciformes : Actinopterygii : Chordata			Perciformes	Blenniidae	Salariinae	2011-11-08	Pacific		Marquesas Islands		Hiva Oa		French Polynesia	Marquesas Islands		Marquesas, Hiva Oa, Tepaapaa, on south end of island.	-9.82464	-139.136	Williams, J. T.; Planes, S.; Sasal, P.; Mourier, J.	MARQ-2011-29		Braveheart			Coralspot, Marquesas 2011	spear	10 to 36					2061003									2014-08-20 19:20:00	http://n2t.net/ark:/65665/3c734c9fb-70f9-4aac-a5ce-d839e5f354c0
USNM	412133	Specimen/Lot		8	Cirripectes variolosus		Cirripectes variolosus : Blenniidae : Perciformes : Actinopterygii : Chordata			Perciformes	Blenniidae	Salariinae	2011-10-29	Pacific		Marquesas Islands		Eiao		French Polynesia	Marquesas Islands		Marquesas, Eiao, Opituha	-8.01972	-140.723	Williams, J. T.; Planes, S.; Delrieu-Trottin, E.; Sasal, P.; Mourier, J.; Veuille, M.; Galzin, R.; Lison de Loma, T.; Mou-Tham, G.	MARQ-2011-09		Braveheart			Coralspot, Marquesas 2011	Rotenone	18 to 31					2061003									2019-06-21 12:52:00	http://n2t.net/ark:/65665/356097439-01d2-4f2d-9b32-8abea8421024
USNM	412142	Specimen/Lot		7	Cirripectes variolosus		Cirripectes variolosus : Blenniidae : Perciformes : Actinopterygii : Chordata			Perciformes	Blenniidae	Salariinae	2008-10-15	Pacific		Marquesas Islands		Mohotane Island		French Polynesia	Marquesas Islands		Marquesas, west coast of Mohotane Island, small cove with with about 5 foot swell in cove, collection made on small coral bommie on sand slope.	-9.97925	-138.842	Williams, J. T.; Planes, S.	JTW 2008-06					Marquesas 2008	Rotenone and spear	6 to 24					2049199									2016-02-05 14:29:00	http://n2t.net/ark:/65665/3b066e184-d35d-4812-b292-46c815dcc988
USNM	412143	Specimen/Lot		8	Cirripectes variolosus		Cirripectes variolosus : Blenniidae : Perciformes : Actinopterygii : Chordata			Perciformes	Blenniidae	Salariinae	2008-10-16	Pacific		Marquesas Islands		Mohotane Island		French Polynesia	Marquesas Islands		Marquesas, west coast of Mohotane Island, just south of small bay in center of island, rocky point at opening of cove with about 6 foot swell, collection made at base of rocky point and onto sand/rubble flat at base.	-9.97178	-138.842	Williams, J. T.; Planes, S.	JTW 2008-09					Marquesas 2008	Rotenone and spear	6 to 26					2049199									2016-02-05 14:29:00	http://n2t.net/ark:/65665/305407746-f921-492c-b6ad-12ecb9e6f2a8
USNM	412144	Specimen/Lot		10	Cirripectes variolosus		Cirripectes variolosus : Blenniidae : Perciformes : Actinopterygii : Chordata			Perciformes	Blenniidae	Salariinae	2011-10-30	Pacific		Marquesas Islands		Eiao		French Polynesia	Marquesas Islands		Marquesas, Eiao, Charner Pointe Nord.	-7.955	-140.662	Williams, J. T.; Planes, S.; Delrieu-Trottin, E.; Sasal, P.; Mourier, J.; Veuille, M.; Galzin, R.; Lison de Loma, T.; Mou-Tham, G.	MARQ-2011-11		Braveheart			Coralspot, Marquesas 2011	Rotenone	20 to 30					2061003									2019-06-21 12:52:00	http://n2t.net/ark:/65665/30af534e3-157d-4e9c-a91f-7c45a68abfb5
USNM	412145	Specimen/Lot		9	Cirripectes variolosus		Cirripectes variolosus : Blenniidae : Perciformes : Actinopterygii : Chordata			Perciformes	Blenniidae	Salariinae	2008-10-17	Pacific		Marquesas Islands		Mohotane Island		French Polynesia	Marquesas Islands		Marquesas, west coast of Mohotane Island, south of small bay in center of island, rocky point at south end of cove with about 8 foot swell, collection made along vertical rock wall and at base of rocky point in aq cave.	-9.99267	-138.837	Williams, J. T.; Planes, S.	JTW 2008-10					Marquesas 2008	Rotenone and spear	6 to 25					2049199									2016-02-05 14:29:00	http://n2t.net/ark:/65665/39ddeb225-6018-4052-ba73-19e077fdbdfd
USNM	412367	Specimen/Lot		4	Cirripectes variolosus		Cirripectes variolosus : Blenniidae : Perciformes : Actinopterygii : Chordata			Perciformes	Blenniidae	Salariinae	2011-11-10	Pacific		Marquesas Islands		Fatu Hiva		French Polynesia	Marquesas Islands		Marquesas, Fatu Hiva, south of Baie Hanavave (Baie des Vierges), north side of Pointe Matautu in small harbor.	-10.471	-138.677	Williams, J. T.; Planes, S.; Delrieu-Trottin, E.; Sasal, P.; Mourier, J.; Galzin, R.	MARQ-2011-33		Braveheart			Coralspot, Marquesas 2011	Rotenone	15 to 25					2061003									2014-08-20 19:20:00	http://n2t.net/ark:/65665/3258804fd-c14c-42f3-a599-1a123685568a
USNM	412368	Specimen/Lot		6	Cirripectes variolosus		Cirripectes variolosus : Blenniidae : Perciformes : Actinopterygii : Chordata			Perciformes	Blenniidae	Salariinae	2011-11-09	Pacific		Marquesas Islands		Fatu Hiva		French Polynesia	Marquesas Islands		Marquesas, Fatu Hiva, Mahitoa point, on southwest side of island.	-10.5346	-138.682	Williams, J. T.; Planes, S.; Delrieu-Trottin, E.; Sasal, P.; Mourier, J.	MARQ-2011-30		Braveheart			Coralspot, Marquesas 2011	Rotenone	7 to 27					2061003									2014-08-20 19:20:00	http://n2t.net/ark:/65665/358e799f4-c6f8-4805-a048-6834ac6fda96
USNM	412816	Specimen/Lot		15	Cirripectes variolosus		Cirripectes variolosus : Blenniidae : Perciformes : Actinopterygii : Chordata			Perciformes	Blenniidae	Salariinae	2010-09-30	Pacific		Gambier Islands		Taravai		French Polynesia	Tuamotu-Gambier		Gambier Archipelago, Ile Taravai, Pointe Mata O Ruarangi, tidepools and adjacent coral reef, rocky shore woith porous volcanic rock at shore and large table corals in water beneath rocks.	-23.1421	-135.045	Williams, J. T.; Planes, S.; Kulbicki, M. L.; Sasal, P.	GAM-2010-06		Claymore II			Coralspot, Gambier Islands 2010	rotenone; spear	0 to 2					2056001									2018-12-03 17:49:00	http://n2t.net/ark:/65665/3dedaccde-eabf-4342-9f89-24d0cd554efd
USNM	419765	Specimen/Lot		1	Cirripectes variolosus		Cirripectes variolosus : Blenniidae : Perciformes : Actinopterygii : Chordata			Perciformes	Blenniidae	Salariinae	2006-07-02	Pacific				Mururoa Atoll		French Polynesia			Mururoa Atoll, reef in lagoon.	-21.8358	-138.836	Williams, J. T.	JTW 2006-13					Mururoa 2006	Rotenone and spear	1 to 6					2041507									2016-02-05 14:29:00	http://n2t.net/ark:/65665/35efa47c4-14ab-4b41-9517-d11a4d22ed1c
USNM	420863	Specimen/Lot		1	Cirripectes variolosus		Cirripectes variolosus : Blenniidae : Perciformes : Actinopterygii : Chordata			Perciformes	Blenniidae	Salariinae	2008-10-13	Pacific		Marquesas Islands		Mohotane Island		French Polynesia	Marquesas Islands		Marquesas, southern tip of Mohotane Island in channel between main island and a small islet, rock wall with sand and boulders at base.	-10.0175	-138.804	Williams, J. T.; Planes, S.	JTW 2008-01	Specimen voucher field number : MOH-004; Specimen voucher field number : mbio18145				Marquesas 2008	Rotenone and spear	5 to 27		ETOH FIXED::1; Photograph::1	Length SL: 53.4mm											2019-11-04 19:42:00	http://n2t.net/ark:/65665/3a3672e72-d1a3-45e1-9b75-2d08b475ed70
USNM	423227	Specimen/Lot		1	Cirripectes variolosus		Cirripectes variolosus : Blenniidae : Perciformes : Actinopterygii : Chordata			Perciformes	Blenniidae	Salariinae	13 Apr 2013 (13 Apr 2013 09:00-10:05)	Pacific		Austral Islands		Raivavae		French Polynesia	Austral Islands		Austral Islands, Raivavae, south side on outer reef with rock and coral.	-23.9122	-147.661	Williams, J. T.; Delrieu-Trottin, E.; Sasal, P.	AUST-2013-05; AURV-07	Specimen voucher field number : AUST-164	Golden Shadow			Global Reef Expedition	Rotenone; spear	3 to 9		Photograph::1	Length SL: 53.5mm		2064501									2017-04-27 15:16:00	http://n2t.net/ark:/65665/36a4047c9-82e0-4b6d-a343-f1bf65efb477
USNM	423227	Genetic Sample		1	Cirripectes variolosus		Cirripectes variolosus : Blenniidae : Perciformes : Actinopterygii : Chordata			Perciformes	Blenniidae	Salariinae	13 Apr 2013 (13 Apr 2013 09:00-10:05)	Pacific		Austral Islands		Raivavae		French Polynesia	Austral Islands		Austral Islands, Raivavae, south side on outer reef with rock and coral.	-23.9122	-147.661	Williams, J. T.; Delrieu-Trottin, E.; Sasal, P.	AUST-2013-05; AURV-07	Specimen voucher field number : AUST-164	Golden Shadow			Global Reef Expedition	Rotenone; spear	3 to 9					2064501	Tissue & Parts/Unknown tissue sample	AD9NJ38	USNM 423227			DMSO-EDTA	No		2017-04-28 20:41:00	http://n2t.net/ark:/65665/3c5fb9de3-3dbf-436c-932a-94d0aec730a2
USNM	423227	Genetic Sample		1	Cirripectes variolosus		Cirripectes variolosus : Blenniidae : Perciformes : Actinopterygii : Chordata			Perciformes	Blenniidae	Salariinae	13 Apr 2013 (13 Apr 2013 09:00-10:05)	Pacific		Austral Islands		Raivavae		French Polynesia	Austral Islands		Austral Islands, Raivavae, south side on outer reef with rock and coral.	-23.9122	-147.661	Williams, J. T.; Delrieu-Trottin, E.; Sasal, P.	AUST-2013-05; AURV-07	Specimen voucher field number : AUST-164	Golden Shadow			Global Reef Expedition	Rotenone; spear	3 to 9					2064501	DNA, RNA, Proteins/Whole genomic DNA	AD9NJ39	USNM 423227	AUSTR162-13		Tris-EDTA	No		2017-04-27 21:01:00	http://n2t.net/ark:/65665/38bdbc004-baa0-449b-aca1-5929def4a820
USNM	423235	Specimen/Lot		1	Cirripectes variolosus		Cirripectes variolosus : Blenniidae : Perciformes : Actinopterygii : Chordata			Perciformes	Blenniidae	Salariinae	13 Apr 2013 (13 Apr 2013 09:00-10:05)	Pacific		Austral Islands		Raivavae		French Polynesia	Austral Islands		Austral Islands, Raivavae, south side on outer reef with rock and coral.	-23.9122	-147.661	Williams, J. T.; Delrieu-Trottin, E.; Sasal, P.	AUST-2013-05; AURV-07	Specimen voucher field number : AUST-163	Golden Shadow			Global Reef Expedition	Rotenone; spear	3 to 9		Photograph::1	Length SL: 66.8mm		2064501									2017-04-27 15:16:00	http://n2t.net/ark:/65665/3496a0996-dff9-48ad-be21-ec4b8c3e4076
USNM	423235	Genetic Sample		1	Cirripectes variolosus		Cirripectes variolosus : Blenniidae : Perciformes : Actinopterygii : Chordata			Perciformes	Blenniidae	Salariinae	13 Apr 2013 (13 Apr 2013 09:00-10:05)	Pacific		Austral Islands		Raivavae		French Polynesia	Austral Islands		Austral Islands, Raivavae, south side on outer reef with rock and coral.	-23.9122	-147.661	Williams, J. T.; Delrieu-Trottin, E.; Sasal, P.	AUST-2013-05; AURV-07	Specimen voucher field number : AUST-163	Golden Shadow			Global Reef Expedition	Rotenone; spear	3 to 9					2064501	Tissue & Parts/Unknown tissue sample	AD9NJ36	USNM 423235			DMSO-EDTA	No		2017-04-28 20:41:00	http://n2t.net/ark:/65665/3fa4083e0-c20a-4772-b18f-d79c3ecb9001
USNM	423235	Genetic Sample		1	Cirripectes variolosus		Cirripectes variolosus : Blenniidae : Perciformes : Actinopterygii : Chordata			Perciformes	Blenniidae	Salariinae	13 Apr 2013 (13 Apr 2013 09:00-10:05)	Pacific		Austral Islands		Raivavae		French Polynesia	Austral Islands		Austral Islands, Raivavae, south side on outer reef with rock and coral.	-23.9122	-147.661	Williams, J. T.; Delrieu-Trottin, E.; Sasal, P.	AUST-2013-05; AURV-07	Specimen voucher field number : AUST-163	Golden Shadow			Global Reef Expedition	Rotenone; spear	3 to 9					2064501	DNA, RNA, Proteins/Whole genomic DNA	AD9NJ37	USNM 423235	AUSTR161-13		Tris-EDTA	No		2017-04-27 21:01:00	http://n2t.net/ark:/65665/3750a4981-7f21-429b-abab-5db63544691b
USNM	423250	Specimen/Lot		1	Cirripectes variolosus		Cirripectes variolosus : Blenniidae : Perciformes : Actinopterygii : Chordata			Perciformes	Blenniidae	Salariinae	13 Apr 2013 (13 Apr 2013 09:00-10:05)	Pacific		Austral Islands		Raivavae		French Polynesia	Austral Islands		Austral Islands, Raivavae, south side on outer reef with rock and coral.	-23.9122	-147.661	Williams, J. T.; Delrieu-Trottin, E.; Sasal, P.	AUST-2013-05; AURV-07	Specimen voucher field number : AUST-162	Golden Shadow			Global Reef Expedition	Rotenone; spear	3 to 9		Photograph::1	Length SL: 69.1mm		2064501									2017-04-27 15:16:00	http://n2t.net/ark:/65665/3aa6cf221-56c6-4e97-8d44-2f94504c4d55
USNM	423250	Genetic Sample		1	Cirripectes variolosus		Cirripectes variolosus : Blenniidae : Perciformes : Actinopterygii : Chordata			Perciformes	Blenniidae	Salariinae	13 Apr 2013 (13 Apr 2013 09:00-10:05)	Pacific		Austral Islands		Raivavae		French Polynesia	Austral Islands		Austral Islands, Raivavae, south side on outer reef with rock and coral.	-23.9122	-147.661	Williams, J. T.; Delrieu-Trottin, E.; Sasal, P.	AUST-2013-05; AURV-07	Specimen voucher field number : AUST-162	Golden Shadow			Global Reef Expedition	Rotenone; spear	3 to 9					2064501	Tissue & Parts/Unknown tissue sample	AD9NJ34	USNM 423250			DMSO-EDTA	No		2017-04-28 20:41:00	http://n2t.net/ark:/65665/36db95c5b-3f3b-4727-afc1-1b74ab8cb8d9
USNM	423250	Genetic Sample		1	Cirripectes variolosus		Cirripectes variolosus : Blenniidae : Perciformes : Actinopterygii : Chordata			Perciformes	Blenniidae	Salariinae	13 Apr 2013 (13 Apr 2013 09:00-10:05)	Pacific		Austral Islands		Raivavae		French Polynesia	Austral Islands		Austral Islands, Raivavae, south side on outer reef with rock and coral.	-23.9122	-147.661	Williams, J. T.; Delrieu-Trottin, E.; Sasal, P.	AUST-2013-05; AURV-07	Specimen voucher field number : AUST-162	Golden Shadow			Global Reef Expedition	Rotenone; spear	3 to 9					2064501	DNA, RNA, Proteins/Whole genomic DNA	AD9NJ35	USNM 423250	AUSTR160-13		Tris-EDTA	No		2017-04-27 21:01:00	http://n2t.net/ark:/65665/3f8964a28-7648-460d-80d7-3d0914109188
USNM	423306	Specimen/Lot		1	Cirripectes variolosus		Cirripectes variolosus : Blenniidae : Perciformes : Actinopterygii : Chordata			Perciformes	Blenniidae	Salariinae	11 Apr 2013 (11 Apr 2013 09:00-10:00)	Pacific		Austral Islands		Raivavae		French Polynesia	Austral Islands		Austral Islands, Raivavae, just outside harbor entrance on outer reef slope with rock and some coral and white sand in channel.	-23.8606	-147.715	Williams, J. T.; Delrieu-Trottin, E.; Sasal, P.	AUST-2013-02; AURV-01	Specimen voucher field number : AUST-056	Golden Shadow			Global Reef Expedition	spear	10 to 15		Photograph::1	Length SL: 28.9mm		2064501									2017-04-27 15:15:00	http://n2t.net/ark:/65665/38a7f7595-f655-4a54-a02f-18c3d679478c
USNM	423306	Genetic Sample		0	Cirripectes variolosus		Cirripectes variolosus : Blenniidae : Perciformes : Actinopterygii : Chordata			Perciformes	Blenniidae	Salariinae	11 Apr 2013 (11 Apr 2013 09:00-10:00)	Pacific		Austral Islands		Raivavae		French Polynesia	Austral Islands		Austral Islands, Raivavae, just outside harbor entrance on outer reef slope with rock and some coral and white sand in channel.	-23.8606	-147.715	Williams, J. T.; Delrieu-Trottin, E.; Sasal, P.	AUST-2013-02; AURV-01	Specimen voucher field number : AUST-056	Golden Shadow			Global Reef Expedition	spear	10 to 15				Entire tissue sample consumed for DNA extraction.	2064501	Tissue & Parts/Unknown tissue sample		USNM 423306				Yes	SAMPLE DEPLETED IN ENTIRETY	2018-09-27 17:12:00	http://n2t.net/ark:/65665/365e704ea-e0e2-45b7-ad92-7cb6b21d7f35
USNM	423306	Genetic Sample		1	Cirripectes variolosus		Cirripectes variolosus : Blenniidae : Perciformes : Actinopterygii : Chordata			Perciformes	Blenniidae	Salariinae	11 Apr 2013 (11 Apr 2013 09:00-10:00)	Pacific		Austral Islands		Raivavae		French Polynesia	Austral Islands		Austral Islands, Raivavae, just outside harbor entrance on outer reef slope with rock and some coral and white sand in channel.	-23.8606	-147.715	Williams, J. T.; Delrieu-Trottin, E.; Sasal, P.	AUST-2013-02; AURV-01	Specimen voucher field number : AUST-056	Golden Shadow			Global Reef Expedition	spear	10 to 15					2064501	DNA, RNA, Proteins/Whole genomic DNA	AD9NH80	USNM 423306	AUSTR056-13		Tris-EDTA	No		2017-04-27 21:01:00	http://n2t.net/ark:/65665/33fb6148a-79bd-49b8-817f-7d1d3bf480d8
USNM	423319	Specimen/Lot		1	Cirripectes variolosus		Cirripectes variolosus : Blenniidae : Perciformes : Actinopterygii : Chordata			Perciformes	Blenniidae	Salariinae	11 Apr 2013 (11 Apr 2013 09:00-10:00)	Pacific		Austral Islands		Raivavae		French Polynesia	Austral Islands		Austral Islands, Raivavae, just outside harbor entrance on outer reef slope with rock and some coral and white sand in channel.	-23.8606	-147.715	Williams, J. T.; Delrieu-Trottin, E.; Sasal, P.	AUST-2013-02; AURV-01	Specimen voucher field number : AUST-052	Golden Shadow			Global Reef Expedition	spear	10 to 15		Photograph::1	Length SL: 30.2mm		2064501									2017-04-27 15:16:00	http://n2t.net/ark:/65665/344d05569-8a84-4483-9ad2-d1d219395fe7
USNM	423319	Genetic Sample		0	Cirripectes variolosus		Cirripectes variolosus : Blenniidae : Perciformes : Actinopterygii : Chordata			Perciformes	Blenniidae	Salariinae	11 Apr 2013 (11 Apr 2013 09:00-10:00)	Pacific		Austral Islands		Raivavae		French Polynesia	Austral Islands		Austral Islands, Raivavae, just outside harbor entrance on outer reef slope with rock and some coral and white sand in channel.	-23.8606	-147.715	Williams, J. T.; Delrieu-Trottin, E.; Sasal, P.	AUST-2013-02; AURV-01	Specimen voucher field number : AUST-052	Golden Shadow			Global Reef Expedition	spear	10 to 15				Entire tissue sample consumed for DNA extraction.	2064501	Tissue & Parts/Unknown tissue sample		USNM 423319				Yes	SAMPLE DEPLETED IN ENTIRETY	2018-09-27 17:12:00	http://n2t.net/ark:/65665/3b718a957-ec84-4fdc-8691-7dac80f86245
USNM	423319	Genetic Sample		1	Cirripectes variolosus		Cirripectes variolosus : Blenniidae : Perciformes : Actinopterygii : Chordata			Perciformes	Blenniidae	Salariinae	11 Apr 2013 (11 Apr 2013 09:00-10:00)	Pacific		Austral Islands		Raivavae		French Polynesia	Austral Islands		Austral Islands, Raivavae, just outside harbor entrance on outer reef slope with rock and some coral and white sand in channel.	-23.8606	-147.715	Williams, J. T.; Delrieu-Trottin, E.; Sasal, P.	AUST-2013-02; AURV-01	Specimen voucher field number : AUST-052	Golden Shadow			Global Reef Expedition	spear	10 to 15					2064501	DNA, RNA, Proteins/Whole genomic DNA	AD9NH76	USNM 423319	AUSTR052-13		Tris-EDTA	No		2017-04-27 21:01:00	http://n2t.net/ark:/65665/3de285d3b-9246-4d6b-866e-0a0c85196455
USNM	423364	Specimen/Lot		1	Cirripectes	Cirripectes cf. variolosus	Cirripectes : Blenniidae : Perciformes : Actinopterygii : Chordata			Perciformes	Blenniidae	Salariinae	14 Apr 2013 (14 Apr 2013 08:00-08:45)	Pacific		Austral Islands	Tubuai Islands	Tubuai		French Polynesia	Austral Islands		Austral Islands, Tubuai south end, outer reef slope with dense coral.	-23.4214	-149.44	Williams, J. T.; Delrieu-Trottin, E.; Sasal, P.	AUST-2013-07; AUTB-09	Specimen voucher field number : AUST-242	Golden Shadow			Global Reef Expedition	Rotenone; spear	18 to 22		Photograph::1	Length SL: 57.8mm		2064501									2017-10-05 20:51:00	http://n2t.net/ark:/65665/39dbfb544-05e6-4387-85f6-9b06c9989952
USNM	423364	Genetic Sample		1	Cirripectes	Cirripectes cf. variolosus	Cirripectes : Blenniidae : Perciformes : Actinopterygii : Chordata			Perciformes	Blenniidae	Salariinae	14 Apr 2013 (14 Apr 2013 08:00-08:45)	Pacific		Austral Islands	Tubuai Islands	Tubuai		French Polynesia	Austral Islands		Austral Islands, Tubuai south end, outer reef slope with dense coral.	-23.4214	-149.44	Williams, J. T.; Delrieu-Trottin, E.; Sasal, P.	AUST-2013-07; AUTB-09	Specimen voucher field number : AUST-242	Golden Shadow			Global Reef Expedition	Rotenone; spear	18 to 22					2064501	Tissue & Parts/Unknown tissue sample	AD9NK60	USNM 423364			DMSO-EDTA	No		2017-10-05 20:51:00	http://n2t.net/ark:/65665/35eeff6a9-84d5-4faf-b690-d57dda6c2a59
USNM	423364	Genetic Sample		1	Cirripectes	Cirripectes cf. variolosus	Cirripectes : Blenniidae : Perciformes : Actinopterygii : Chordata			Perciformes	Blenniidae	Salariinae	14 Apr 2013 (14 Apr 2013 08:00-08:45)	Pacific		Austral Islands	Tubuai Islands	Tubuai		French Polynesia	Austral Islands		Austral Islands, Tubuai south end, outer reef slope with dense coral.	-23.4214	-149.44	Williams, J. T.; Delrieu-Trottin, E.; Sasal, P.	AUST-2013-07; AUTB-09	Specimen voucher field number : AUST-242	Golden Shadow			Global Reef Expedition	Rotenone; spear	18 to 22					2064501	DNA, RNA, Proteins/Whole genomic DNA	AD9NK61	USNM 423364	AUSTR240-13		Tris-EDTA	No		2017-10-05 20:51:00	http://n2t.net/ark:/65665/364a455ad-219a-4547-9076-4b3311e3035a
USNM	424495	Specimen/Lot		1	Cirripectes variolosus		Cirripectes variolosus : Blenniidae : Perciformes : Actinopterygii : Chordata			Perciformes	Blenniidae	Salariinae	2008-09-12	Pacific			Palau SW Islands	Fana		Palau	Sonsorol State		Central east coast of Fana Island.	5.3547	132.232	Williams, J. T.; Westneat, M. W.; Winterbottom, R.; Holleman, W.	PAL 08-5		Pacific Explorer II			Palau SW Islands 2008	Rotenone and spear	6					2049200									2020-01-23 17:41:00	http://n2t.net/ark:/65665/336e5678d-8dc3-49aa-ab03-9c8f38e8af44
USNM	429188	Specimen/Lot		1	Cirripectes variolosus		Cirripectes variolosus : Blenniidae : Perciformes : Actinopterygii : Chordata			Perciformes	Blenniidae	Salariinae	2008-09-27	Pacific			Palau SW Islands	Helen Reef		Palau	Hatohobei		Outer edge of reef at northwest tip of of Helen Reef just north of a large shipwreck.	3.0111	131.808	Williams, J. T.; Westneat, M. W.; Winterbottom, R.; Holleman, W.	PAL 08-46		Pacific Explorer II			Palau SW Islands 2008	Rotenone and spear	2 to 10					2049200									2020-01-23 17:42:00	http://n2t.net/ark:/65665/369aaf568-bf8f-4060-9d86-ebba94166129
USNM	429307	Specimen/Lot		1	Cirripectes variolosus		Cirripectes variolosus : Blenniidae : Perciformes : Actinopterygii : Chordata			Perciformes	Blenniidae	Salariinae	2008-09-27	Pacific			Palau SW Islands	Helen Reef		Palau	Hatohobei		Outer edge of reef at northwest tip of of Helen Reef just north of a large shipwreck.	3.0111	131.808	Williams, J. T.; Westneat, M. W.; Winterbottom, R.; Holleman, W.	PAL 08-46		Pacific Explorer II			Palau SW Islands 2008	Rotenone and spear	2 to 10		Photograph			2049200									2020-01-23 17:42:00	http://n2t.net/ark:/65665/3f9478de8-551b-4dc5-b6de-fbe5b2144149
USNM	430781	Specimen/Lot		10	Cirripectes variolosus		Cirripectes variolosus : Blenniidae : Perciformes : Actinopterygii : Chordata			Perciformes	Blenniidae	Salariinae	13 Apr 2013 (13 Apr 2013 09:00-10:05)	Pacific		Austral Islands		Raivavae		French Polynesia	Austral Islands		Austral Islands, Raivavae, south side on outer reef with rock and coral.	-23.9122	-147.661	Williams, J. T.; Delrieu-Trottin, E.; Sasal, P.	AUST-2013-05; AURV-07		Golden Shadow			Global Reef Expedition	Rotenone; spear	3 to 9					2064501									2014-08-20 19:28:00	http://n2t.net/ark:/65665/308bdba9b-0b9b-4b1e-b55f-807598d00e77
USNM	430801	Specimen/Lot		1	Cirripectes variolosus		Cirripectes variolosus : Blenniidae : Perciformes : Actinopterygii : Chordata			Perciformes	Blenniidae	Salariinae	20 Apr 2013 (20 Apr 2013 09:00-10:10)	Pacific		Austral Islands		Maria Atoll		French Polynesia	Austral Islands		Austral Islands, Maria Atoll, exposed barrier reef crest and channels with high energy surf, sand and large pieces of coral at bottom of channels. Surge channel lead into lagoon.	-21.8131	-154.689	Williams, J. T.; Delrieu-Trottin, E.; Sasal, P.	AUST-2013-21; AUMA-26		Golden Shadow			Global Reef Expedition	Rotenone; spear	0 to 9					2064501									2014-08-20 19:28:00	http://n2t.net/ark:/65665/300d726a9-2e91-4c97-b389-42788031b4d9
USNM	430832	Specimen/Lot		6	Cirripectes variolosus		Cirripectes variolosus : Blenniidae : Perciformes : Actinopterygii : Chordata			Perciformes	Blenniidae	Salariinae	17 Apr 2013 (17 Apr 2013 08:30-09:45)	Pacific		Austral Islands	Tubuai Islands	Rurutu		French Polynesia	Austral Islands		Austral Islands, Rurutu, northeast side of island, exposed reef crest and channels with high energy surf, sand at bottom of channels.	-22.4522	-151.324	Williams, J. T.; Delrieu-Trottin, E.; Sasal, P.	AUST-2013-15; AURR-18		Golden Shadow			Global Reef Expedition	Rotenone; spear	0 to 8					2064501									2014-08-20 19:28:00	http://n2t.net/ark:/65665/351fd27d6-ac0a-4f69-a811-288de4d5da88
USNM	431185	Specimen/Lot		1	Cirripectes variolosus		Cirripectes variolosus : Blenniidae : Perciformes : Actinopterygii : Chordata			Perciformes	Blenniidae	Salariinae	2010-10-11	Pacific		Gambier Islands		Teauaone		French Polynesia	Tuamotu-Gambier		Gambier Archipelago, Teauaone Islet, due north of Mangareva, Coral channel in surge zone just next to breakers on barrier reef, rock surge channel.	-23.011	-134.971	Williams, J. T.; Planes, S.; Sasal, P.; Delrieu-Trottin, E.	GAM-2010-38		Claymore II			Coralspot, Gambier Islands 2010	rotenone; spear	1 to 5					2056001									2016-02-05 14:29:00	http://n2t.net/ark:/65665/3d6d81134-e522-4186-99d2-900852c50b98
USNM	435083	Specimen/Lot		1	Cirripectes variolosus		Cirripectes variolosus : Blenniidae : Perciformes : Actinopterygii : Chordata			Perciformes	Blenniidae	Salariinae	2014-12-03	Pacific		Society Islands		Mopelia Atoll [Maupihaa]		French Polynesia	Leeward Islands		Mopelia Atoll, surge channel on reef crest beneath breaking waves just to the left (NE) of the ship passage into the lagoon on NNW side of atoll, coral and rock	-16.8474	-153.933	Williams, J. T.; Planes, S.; Tolou, N.; Parravicini, V.; Sasal, P.; Blais, C.	SCIL-2014-12; MO04	Specimen voucher field number : SCIL-194	Braveheart			Mission Scilly, 2014	Rotenone; dip net; spear	0 to 2		Photograph::1	Length SL: 48.3mm		2071949									2017-03-27 13:22:00	http://n2t.net/ark:/65665/3e120184d-13e0-4de3-91a9-6f41567dbb72
USNM	435083	Genetic Sample		1	Cirripectes variolosus		Cirripectes variolosus : Blenniidae : Perciformes : Actinopterygii : Chordata			Perciformes	Blenniidae	Salariinae	2014-12-03	Pacific		Society Islands		Mopelia Atoll [Maupihaa]		French Polynesia	Leeward Islands		Mopelia Atoll, surge channel on reef crest beneath breaking waves just to the left (NE) of the ship passage into the lagoon on NNW side of atoll, coral and rock	-16.8474	-153.933	Williams, J. T.; Planes, S.; Tolou, N.; Parravicini, V.; Sasal, P.; Blais, C.	SCIL-2014-12; MO04	Specimen voucher field number : SCIL-194	Braveheart			Mission Scilly, 2014	Rotenone; dip net; spear	0 to 2					2071949	Tissue & Parts/Unknown tissue sample	AB4OI05	USNM 435083			95% Ethanol	No		2017-03-27 13:38:00	http://n2t.net/ark:/65665/39cc188f9-86cb-49ec-b258-9e971f321cd5
USNM	435083	Genetic Sample		1	Cirripectes variolosus		Cirripectes variolosus : Blenniidae : Perciformes : Actinopterygii : Chordata			Perciformes	Blenniidae	Salariinae	2014-12-03	Pacific		Society Islands		Mopelia Atoll [Maupihaa]		French Polynesia	Leeward Islands		Mopelia Atoll, surge channel on reef crest beneath breaking waves just to the left (NE) of the ship passage into the lagoon on NNW side of atoll, coral and rock	-16.8474	-153.933	Williams, J. T.; Planes, S.; Tolou, N.; Parravicini, V.; Sasal, P.; Blais, C.	SCIL-2014-12; MO04	Specimen voucher field number : SCIL-194	Braveheart			Mission Scilly, 2014	Rotenone; dip net; spear	0 to 2					2071949	DNA, RNA, Proteins/Whole genomic DNA	AG7PT22	USNM 435083	SCILL194-15		Tris-EDTA	No		2017-04-05 18:36:00	http://n2t.net/ark:/65665/3a51e422b-a232-49ac-bd6f-fc18c0eb7892
USNM	435141	Specimen/Lot		1	Cirripectes variolosus		Cirripectes variolosus : Blenniidae : Perciformes : Actinopterygii : Chordata			Perciformes	Blenniidae	Salariinae	2014-12-04	Pacific		Society Islands		Mopelia Atoll [Maupihaa]		French Polynesia	Leeward Islands		Mopelia Atoll, shallow patch reef in lagoon, at northeast part of lagoon with sand around it	-16.7907	-153.975	Williams, J. T.; Planes, S.; Tolou, N.; Parravicini, V.; Sasal, P.; Bedford, C.; Blais, C.	SCIL-2014-15; ML02	Specimen voucher field number : SCIL-252	Braveheart			Mission Scilly, 2014	Rotenone; dip net; spear	0.8 to 1		Photograph::1	Length SL: 43.3mm		2071949									2017-03-27 13:22:00	http://n2t.net/ark:/65665/3a794dbb0-6d8f-441e-8f46-453dc58b6fb2
USNM	435141	Genetic Sample		1	Cirripectes variolosus		Cirripectes variolosus : Blenniidae : Perciformes : Actinopterygii : Chordata			Perciformes	Blenniidae	Salariinae	2014-12-04	Pacific		Society Islands		Mopelia Atoll [Maupihaa]		French Polynesia	Leeward Islands		Mopelia Atoll, shallow patch reef in lagoon, at northeast part of lagoon with sand around it	-16.7907	-153.975	Williams, J. T.; Planes, S.; Tolou, N.; Parravicini, V.; Sasal, P.; Bedford, C.; Blais, C.	SCIL-2014-15; ML02	Specimen voucher field number : SCIL-252	Braveheart			Mission Scilly, 2014	Rotenone; dip net; spear	0.8 to 1					2071949	Tissue & Parts/Unknown tissue sample	AB4OI63	USNM 435141			95% Ethanol	No		2017-03-27 13:38:00	http://n2t.net/ark:/65665/35168e4cf-b50d-4dac-a4bd-e0a964579506
USNM	435141	Genetic Sample		1	Cirripectes variolosus		Cirripectes variolosus : Blenniidae : Perciformes : Actinopterygii : Chordata			Perciformes	Blenniidae	Salariinae	2014-12-04	Pacific		Society Islands		Mopelia Atoll [Maupihaa]		French Polynesia	Leeward Islands		Mopelia Atoll, shallow patch reef in lagoon, at northeast part of lagoon with sand around it	-16.7907	-153.975	Williams, J. T.; Planes, S.; Tolou, N.; Parravicini, V.; Sasal, P.; Bedford, C.; Blais, C.	SCIL-2014-15; ML02	Specimen voucher field number : SCIL-252	Braveheart			Mission Scilly, 2014	Rotenone; dip net; spear	0.8 to 1					2071949	DNA, RNA, Proteins/Whole genomic DNA	AG7PT80	USNM 435141	SCILL252-15		Tris-EDTA	No		2017-04-05 18:36:00	http://n2t.net/ark:/65665/3733c1dd4-896f-42ef-bac3-1a5cce629bba
USNM	439540	Genetic Sample		0	Cirripectes variolosus		Cirripectes variolosus : Blenniidae : Perciformes : Actinopterygii : Chordata			Perciformes	Blenniidae	Salariinae	2006-03-11	Pacific		Society Islands		Moorea		French Polynesia			Moorea, Matautia village.	-17.4825	-149.882	Causse, R.; Grignon, J.; Lecchini, D.; Messmer, V.; Planes, S.; Williams, J. T.	Moorea F-06-04	Specimen voucher field number : mbio307; Specimen voucher catalog number : MNHN-IC-2008-0362				Biocode Moorea 2006	Hand net with anaesthetic	2 to 4				Entire tissue sample consumed for DNA extraction. Specimen voucher located at Museum National d'Histoire Naturelle, Paris.	2043845	Tissue & Parts/Unknown tissue sample		Museum National d'Histoire Naturelle, Paris MNHN-IC-2008-0362				Yes	SAMPLE DEPLETED IN ENTIRETY	2018-09-27 17:11:00	http://n2t.net/ark:/65665/3788c444d-95ca-4c7a-9baa-f655aa91aa9b
USNM	439540	Genetic Sample		1	Cirripectes variolosus		Cirripectes variolosus : Blenniidae : Perciformes : Actinopterygii : Chordata			Perciformes	Blenniidae	Salariinae	2006-03-11	Pacific		Society Islands		Moorea		French Polynesia			Moorea, Matautia village.	-17.4825	-149.882	Causse, R.; Grignon, J.; Lecchini, D.; Messmer, V.; Planes, S.; Williams, J. T.	Moorea F-06-04	Specimen voucher field number : mbio307; Specimen voucher catalog number : MNHN-IC-2008-0362				Biocode Moorea 2006	Hand net with anaesthetic	2 to 4				Specimen voucher located at Museum National d'Histoire Naturelle, Paris.	2043845	DNA, RNA, Proteins/Whole genomic DNA	AG5NS63	Museum National d'Histoire Naturelle, Paris MNHN-IC-2008-0362			Tris-EDTA	No		2018-09-09 14:26:00	http://n2t.net/ark:/65665/38f66848e-7b4e-4fd0-8e80-37f0017b8c48
USNM	439540	Genetic Sample		1	Cirripectes variolosus		Cirripectes variolosus : Blenniidae : Perciformes : Actinopterygii : Chordata			Perciformes	Blenniidae	Salariinae	2006-03-11	Pacific		Society Islands		Moorea		French Polynesia			Moorea, Matautia village.	-17.4825	-149.882	Causse, R.; Grignon, J.; Lecchini, D.; Messmer, V.; Planes, S.; Williams, J. T.	Moorea F-06-04	Specimen voucher field number : mbio307; Specimen voucher catalog number : MNHN-IC-2008-0362				Biocode Moorea 2006	Hand net with anaesthetic	2 to 4				Specimen voucher located at Museum National d'Histoire Naturelle, Paris.	2043845	Tissue & Parts/Fin-clip	AH7ZX01	Museum National d'Histoire Naturelle, Paris MNHN-IC-2008-0362				No		2018-09-09 14:28:00	http://n2t.net/ark:/65665/3e64e00e3-2693-4f5e-ba4c-31feeb58e0d5
USNM	439540	Image		1	Cirripectes variolosus		Cirripectes variolosus : Blenniidae : Perciformes : Actinopterygii : Chordata			Perciformes	Blenniidae	Salariinae	2006-03-11	Pacific		Society Islands		Moorea		French Polynesia			Moorea, Matautia village.	-17.4825	-149.882	Causse, R.; Grignon, J.; Lecchini, D.; Messmer, V.; Planes, S.; Williams, J. T.	Moorea F-06-04	Specimen voucher field number : mbio307; Specimen voucher catalog number : MNHN-IC-2008-0362				Biocode Moorea 2006	Hand net with anaesthetic	2 to 4		Photograph::1		Specimen voucher located at Museum National d'Histoire Naturelle, Paris.	2043845									2017-04-05 18:35:00	http://n2t.net/ark:/65665/386f0d067-42fe-4993-9bc2-3bc4ef445cf6
USNM	439541	Genetic Sample		0	Cirripectes variolosus		Cirripectes variolosus : Blenniidae : Perciformes : Actinopterygii : Chordata			Perciformes	Blenniidae	Salariinae	2006-03-11	Pacific		Society Islands		Moorea		French Polynesia			Moorea, Matautia village.	-17.4825	-149.882	Causse, R.; Grignon, J.; Lecchini, D.; Messmer, V.; Planes, S.; Williams, J. T.	Moorea F-06-04	Specimen voucher field number : mbio308; Specimen voucher catalog number : MNHN-IC-2008-0363				Biocode Moorea 2006	Hand net with anaesthetic	2 to 4				Entire tissue sample consumed for DNA extraction. Specimen voucher located at Museum National d'Histoire Naturelle, Paris.	2043845	Tissue & Parts/Unknown tissue sample		Museum National d'Histoire Naturelle, Paris MNHN-IC-2008-0363				Yes	SAMPLE DEPLETED IN ENTIRETY	2018-09-27 17:11:00	http://n2t.net/ark:/65665/3ac14b38b-fa84-4c35-b5b5-af93d6124bed
USNM	439541	Genetic Sample		1	Cirripectes variolosus		Cirripectes variolosus : Blenniidae : Perciformes : Actinopterygii : Chordata			Perciformes	Blenniidae	Salariinae	2006-03-11	Pacific		Society Islands		Moorea		French Polynesia			Moorea, Matautia village.	-17.4825	-149.882	Causse, R.; Grignon, J.; Lecchini, D.; Messmer, V.; Planes, S.; Williams, J. T.	Moorea F-06-04	Specimen voucher field number : mbio308; Specimen voucher catalog number : MNHN-IC-2008-0363				Biocode Moorea 2006	Hand net with anaesthetic	2 to 4				Specimen voucher located at Museum National d'Histoire Naturelle, Paris.	2043845	DNA, RNA, Proteins/Whole genomic DNA	AG5NS64	Museum National d'Histoire Naturelle, Paris MNHN-IC-2008-0363			Tris-EDTA	No		2018-09-09 14:26:00	http://n2t.net/ark:/65665/371a520a8-6a11-4df4-9c3c-00ee4c7297f2
USNM	439541	Genetic Sample		1	Cirripectes variolosus		Cirripectes variolosus : Blenniidae : Perciformes : Actinopterygii : Chordata			Perciformes	Blenniidae	Salariinae	2006-03-11	Pacific		Society Islands		Moorea		French Polynesia			Moorea, Matautia village.	-17.4825	-149.882	Causse, R.; Grignon, J.; Lecchini, D.; Messmer, V.; Planes, S.; Williams, J. T.	Moorea F-06-04	Specimen voucher field number : mbio308; Specimen voucher catalog number : MNHN-IC-2008-0363				Biocode Moorea 2006	Hand net with anaesthetic	2 to 4				Specimen voucher located at Museum National d'Histoire Naturelle, Paris.	2043845	Tissue & Parts/Fin-clip	AH7ZX02	Museum National d'Histoire Naturelle, Paris MNHN-IC-2008-0363				No		2018-09-09 14:37:00	http://n2t.net/ark:/65665/30cb9b716-e152-4c7c-981a-633a5753a048
USNM	439541	Image		1	Cirripectes variolosus		Cirripectes variolosus : Blenniidae : Perciformes : Actinopterygii : Chordata			Perciformes	Blenniidae	Salariinae	2006-03-11	Pacific		Society Islands		Moorea		French Polynesia			Moorea, Matautia village.	-17.4825	-149.882	Causse, R.; Grignon, J.; Lecchini, D.; Messmer, V.; Planes, S.; Williams, J. T.	Moorea F-06-04	Specimen voucher field number : mbio308; Specimen voucher catalog number : MNHN-IC-2008-0363				Biocode Moorea 2006	Hand net with anaesthetic	2 to 4		Photograph::1	Length SL: 49mm	Specimen voucher located at Museum National d'Histoire Naturelle, Paris.	2043845									2017-04-05 18:35:00	http://n2t.net/ark:/65665/33c116f00-96fd-4ab1-934c-7ffc5a164456
USNM	446022	Specimen/Lot		1	Cirripectes variolosus		Cirripectes variolosus : Blenniidae : Perciformes : Actinopterygii : Chordata			Perciformes	Blenniidae	Salariinae	2016-12-11	Pacific				Futuna		Wallis and Futuna			Wallis and Futuna, Futuna Island, off west coast, off Nuku, outer reef spur and groove.	-14.2994	-178.161	Williams, J. T.; Planes, S.	FUT-2016-01	Specimen voucher field number : FUT-004					Rotenone; SCUBA	8 to 16			Length SL: 44mm		2082942									2018-12-10 14:58:00	http://n2t.net/ark:/65665/3e4d262f8-4d29-4782-a326-c4a7c48e87c1
USNM	446022	Genetic Sample		1	Cirripectes variolosus		Cirripectes variolosus : Blenniidae : Perciformes : Actinopterygii : Chordata			Perciformes	Blenniidae	Salariinae	2016-12-11	Pacific				Futuna		Wallis and Futuna			Wallis and Futuna, Futuna Island, off west coast, off Nuku, outer reef spur and groove.	-14.2994	-178.161	Williams, J. T.; Planes, S.	FUT-2016-01	Specimen voucher field number : FUT-004					Rotenone; SCUBA	8 to 16					2082942	Tissue & Parts/Fin-clip	AL1HE31	USNM 446022				Yes		2019-03-28 20:34:00	http://n2t.net/ark:/65665/3e69a65b6-977c-417a-9c18-b38a7c5bd02f
USNM	446022	Genetic Sample		1	Cirripectes variolosus		Cirripectes variolosus : Blenniidae : Perciformes : Actinopterygii : Chordata			Perciformes	Blenniidae	Salariinae	2016-12-11	Pacific				Futuna		Wallis and Futuna			Wallis and Futuna, Futuna Island, off west coast, off Nuku, outer reef spur and groove.	-14.2994	-178.161	Williams, J. T.; Planes, S.	FUT-2016-01	Specimen voucher field number : FUT-004					Rotenone; SCUBA	8 to 16					2082942	DNA, RNA, Proteins/Whole genomic DNA	AL9PD07	USNM 446022				Yes		2019-07-09 20:07:00	http://n2t.net/ark:/65665/32230b40a-75d7-4e78-bf00-39d7bb79a987
USNM	449314	Genetic Sample		1	Cirripectes variolosus		Cirripectes variolosus : Blenniidae : Perciformes : Actinopterygii : Chordata			Perciformes	Blenniidae	Salariinae	2008-09-30	Pacific		Society Islands		Moorea		French Polynesia			West coast of Moorea	-17.5255	-149.933	Lerouvreur, F.; Espiau, B.	FP2 300908	Specimen voucher field number : FLMOO 008; Specimen voucher field number : mbio17865			1357		Plankton Tow				Length SL: 2mm		2087789	Whole genomic DNA	AF4CY72	No Specimen Voucher				No		2019-11-06 22:07:00	http://n2t.net/ark:/65665/3c6fb103a-7db4-420e-8dee-5514e5af6e98
USNM	449523	Genetic Sample		1	Cirripectes variolosus		Cirripectes variolosus : Blenniidae : Perciformes : Actinopterygii : Chordata			Perciformes	Blenniidae	Salariinae	2010-03-24	Pacific		Society Islands		Moorea		French Polynesia			Moorea			Lerouvreur, F.; Espiau, B.	FP6 240310	Specimen voucher field number : FLMOO 1106; Specimen voucher field number : mbio38362			7407		Plankton Tow	1 to 50			Length SL: 2mm		2087789	Whole genomic DNA	AG0IN17	No Specimen Voucher				No		2019-11-06 22:07:00	http://n2t.net/ark:/65665/301b55c38-4e62-4182-b3e8-4195e7ee487e
USNM	449791	Genetic Sample		1	Cirripectes variolosus		Cirripectes variolosus : Blenniidae : Perciformes : Actinopterygii : Chordata			Perciformes	Blenniidae	Salariinae	2008-10-29	Pacific		Society Islands		Moorea		French Polynesia			North coast of Moorea	-17.4726	-149.831	Lerouvreur, F.; Espiau, B.	FP6 291008	Specimen voucher field number : FLMOO 135; Specimen voucher field number : mbio17992			1349		Plankton Tow				Length SL: 1.6mm		2087789	Whole genomic DNA	AF4CZ47	No Specimen Voucher				No		2019-11-06 22:07:00	http://n2t.net/ark:/65665/312625930-4e97-4adc-8064-8c601fa0bc4a

## Sheet: BPBM
Institution Code	Catalog Number	Genus:	Species:	#A	Min	Max	Size Type	Photo Type:	Comments:	Locality	Locality	Specific Locality	Habitat	Min Depth	Max Depth	Depth Units	Method	Collector(s)	Date
BPBM	12270	Cirripectes	variolosus	4	29	63	SL			Pitcairn Group	Ducie Atoll	off SW side		100		ft	Rotenone	J.E. Randall, R.R. Costello, D.B. Cannoy, S.R. Christian, and R.M. McNair	1971-01-15
BPBM	14060	Cirripectes	variolosus	1	56		SL			Line Islands	Fanning Island	seaward reef from Palmer's						E.H. Chave and D.B. Eckert	Jul 1972
BPBM	16928	Cirripectes	variolosus	2	44	49	SL	Color	http://pbs.bishopmuseum.org/images/JER/detail.asp?size=t&cols=5&ID=-448275972	Pitcairn Group	Pitcairn Island	SE side; off Down Rope (="The Rope")	rock, sand, some live coral	90	100	ft	Rotenone	J.E. Randall, D.B. Cannoy, and S.R. Christian	1970-12-23
BPBM	16941	Cirripectes	variolosus	2	25	84	SL			Pitcairn Group	Pitcairn Island	S side; off McCoy; reef		75	85	ft	Rotenone	J.E. Randall, D.B. Cannoy, J.R. Haywood, J.D. Bryant, and S.R. Christian	1971-01-04

## Sheet: CAS
Institution Code	Catalog Number	Species	Country	State/Province	Locality	Collected By	Date Collected	Latitude	Longitude
CAS	48965	Cirripectes variolosus	French Polynesia	Iles Tuamotu-gambier	Opposite Ngarumaoa Village On Outer Reef, West Side Of Raroia.	J. Morrison For R.r. Harry (rofen)	1952-07-08	-16.0167	-142.433
